# Supplementary material for: Rare predicted loss of function alleles in Bassoon (BSN) are associated with obesity
Source: PubMed Central journal article supplement (PMC10590409; doi:10.1038/s41525-023-00376-7), 2023-10-21
Supplement: 41525_2023_376_MOESM1_ESM.pdf [file 41525_2023_376_MOESM1_ESM.pdf]

Supplementary Figures:

Supplementary Figure 1.

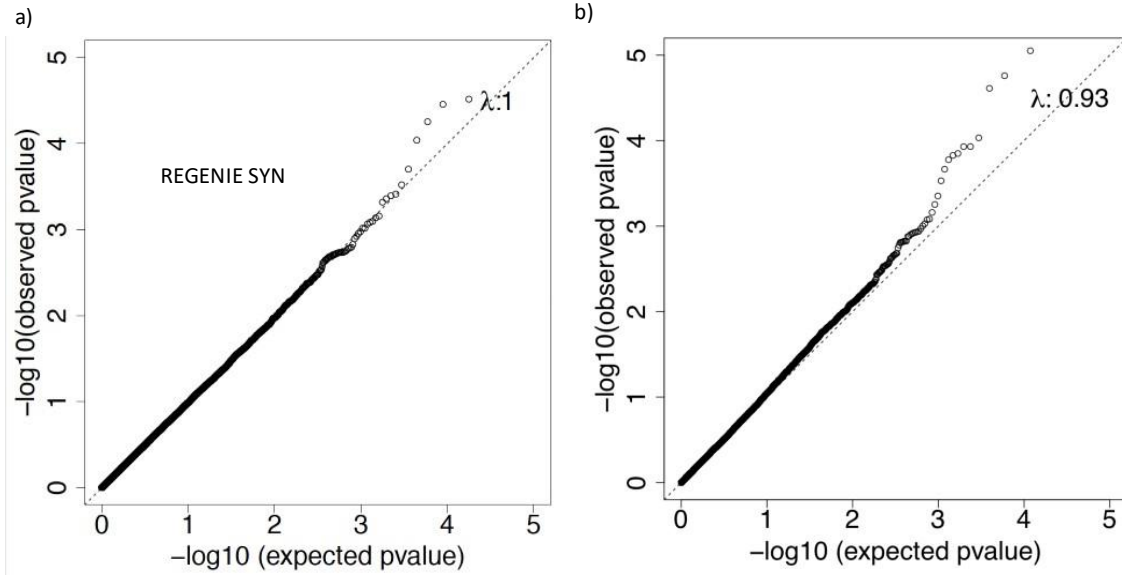

Supplementary Figure 2

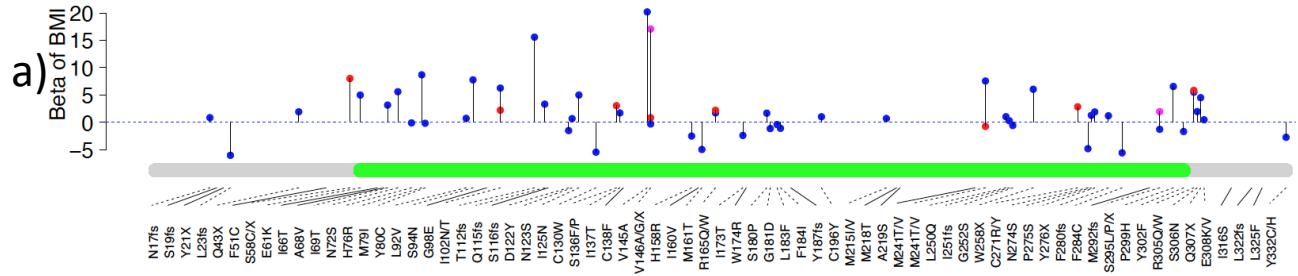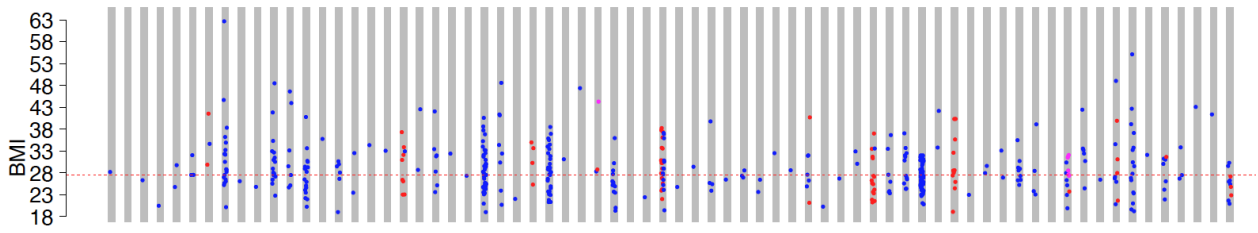

N17s S19fs Y21X L23fs Q43X F51C S58C7X E61K I66T A68V I69T N72S H76R M79I Y80C L92V S94N G98E I102N/T T112s Q115fs S116fs D122Y N123S I125N C130W S136F/P I137T C138F V145A V146A/G/X H158R I160V M161T R165S/W I173I W174R S180P G181D L183F F184I Y187fs C196Y M215I/V M218T A219S M241T/V M241T/V L250Q I251fs G252S W258X C271R/Y N274S P275S Y276X F280fs F284C M292fs S295L/P/X P299H Y302F R305Q/W S306N Q307X E308K/V I316S L322fs L325F Y332C/H

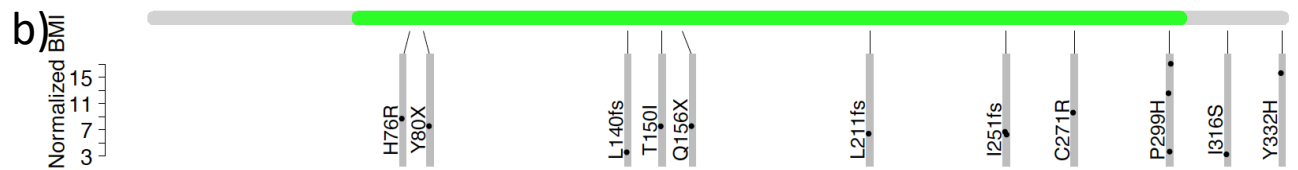

Supplementary Figure 3

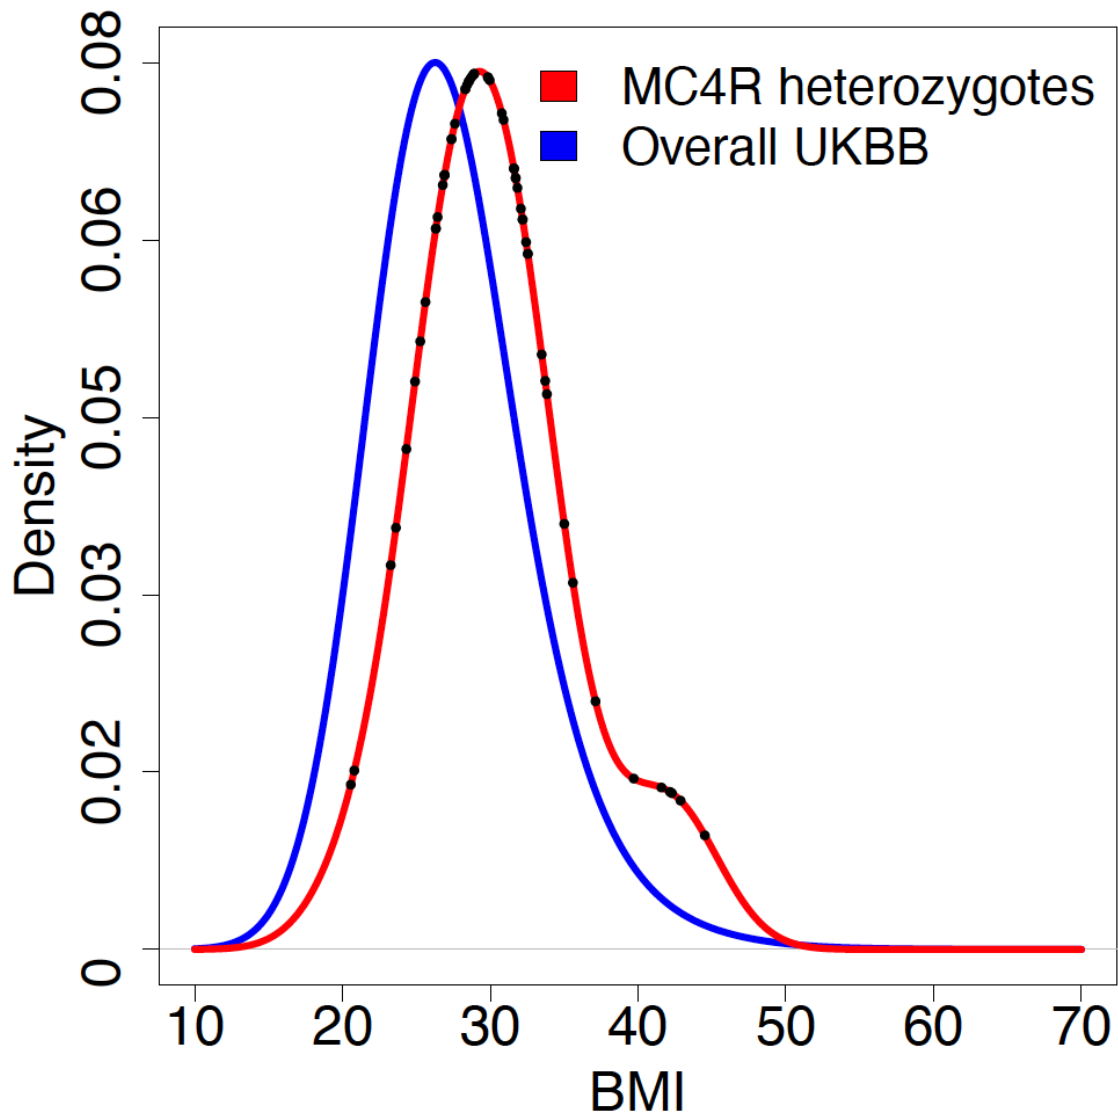

## Supplementary tables:

## Supplementary table 1

| Deleterious MC4R variants, transcript ID:ENST00000299766, in UKBB cohort |      |        |     |                   |                    |             |               |                |              |               |              |  |
|--------------------------------------------------------------------------|------|--------|-----|-------------------|--------------------|-------------|---------------|----------------|--------------|---------------|--------------|--|
| proband                                                                  | BMI  | Sex    | age | HGVSp             | Consequence        | UKBB<br>MAF | CADD<br>phred | REVEL<br>score | TOPMed<br>AF | gnomAD3<br>AF | gnomAD<br>AF |  |
| 3093062                                                                  | 28.2 | female | 61  | p.Asn17GlufsTer13 | frameshift_variant | 2.5E-06     | .             | .              | 8.0E-06      | 7.0E-06       | 4.0E-06      |  |
| 4704264                                                                  | NA   | NA     | NA  | p.Ser19AlafsTer34 | frameshift_variant | 2.5E-06     | .             | .              | .            | .             | 4.0E-06      |  |
| 5671748                                                                  | 26.3 | female | 53  | p.Tyr21Ter        | stop_gained        | 2.5E-06     | .             | .              | .            | .             | 1.2E-05      |  |
| 1177906                                                                  | 20.5 | female | 68  | p.Leu23ArgfsTer30 | frameshift_variant | 2.5E-06     | .             | .              | .            | .             | .            |  |
| 2106752                                                                  | 24.8 | female | 62  | p.Gln43Ter        | stop_gained        | 5.0E-06     | 40            | .              | .            | .             | 4.0E-06      |  |
| 5331630                                                                  | 29.8 | male   | 68  | p.Gln43Ter        | stop_gained        | 5.0E-06     | 40            | .              | .            | .             | 4.0E-06      |  |
| 2441968                                                                  | 27.5 | male   | 64  | p.Phe51Cys        | missense_variant   | 7.5E-06     | 27.8          | 0.66           | .            | .             | .            |  |
| 3630335                                                                  | 32.0 | female | 65  | p.Phe51Cys        | missense_variant   | 7.5E-06     | 27.8          | 0.66           | .            | .             | .            |  |
| 3952605                                                                  | 27.5 | male   | 68  | p.Phe51Cys        | missense_variant   | 7.5E-06     | 27.8          | 0.66           | .            | .             | .            |  |
| 1028732                                                                  | 29.9 | female | 64  | p.Ser58AlafsTer7  | frameshift_variant | 5.0E-06     | .             | .              | .            | .             | 4.0E-06      |  |
| 5298968                                                                  | 41.5 | female | 55  | p.Ser58AlafsTer7  | frameshift_variant | 5.0E-06     | .             | .              | .            | .             | 4.0E-06      |  |
| 1843997                                                                  | 34.6 | female | 52  | p.Ser58Cys        | missense_variant   | 2.5E-06     | 26.7          | 0.61           | .            | .             | .            |  |
| 1076923                                                                  | NA   | NA     | NA  | p.Glu61Lys        | missense_variant   | 5.5E-05     | 29.6          | 0.75           | 2.4E-05      | 1.4E-05       | 2.0E-05      |  |
| 1218226                                                                  | 44.7 | female | 60  | p.Glu61Lys        | missense_variant   | 5.5E-05     | 29.6          | 0.75           | 2.4E-05      | 1.4E-05       | 2.0E-05      |  |
| 1613267                                                                  | 27.0 | male   | 65  | p.Glu61Lys        | missense_variant   | 5.5E-05     | 29.6          | 0.75           | 2.4E-05      | 1.4E-05       | 2.0E-05      |  |
| 1769858                                                                  | 25.2 | female | 49  | p.Glu61Lys        | missense_variant   | 5.5E-05     | 29.6          | 0.75           | 2.4E-05      | 1.4E-05       | 2.0E-05      |  |
| 2059112                                                                  | 62.7 | female | 59  | p.Glu61Lys        | missense_variant   | 5.5E-05     | 29.6          | 0.75           | 2.4E-05      | 1.4E-05       | 2.0E-05      |  |
| 2177681                                                                  | 25.6 | female | 48  | p.Glu61Lys        | missense_variant   | 5.5E-05     | 29.6          | 0.75           | 2.4E-05      | 1.4E-05       | 2.0E-05      |  |
| 2214923                                                                  | 32.3 | female | 65  | p.Glu61Lys        | missense_variant   | 5.5E-05     | 29.6          | 0.75           | 2.4E-05      | 1.4E-05       | 2.0E-05      |  |
| 2327276                                                                  | 27.5 | female | 67  | p.Glu61Lys        | missense_variant   | 5.5E-05     | 29.6          | 0.75           | 2.4E-05      | 1.4E-05       | 2.0E-05      |  |
| 2370118                                                                  | 32.4 | male   | 64  | p.Glu61Lys        | missense_variant   | 5.5E-05     | 29.6          | 0.75           | 2.4E-05      | 1.4E-05       | 2.0E-05      |  |
| 2413810                                                                  | 30.5 | female | 46  | p.Glu61Lys        | missense_variant   | 5.5E-05     | 29.6          | 0.75           | 2.4E-05      | 1.4E-05       | 2.0E-05      |  |
| 2413908                                                                  | 36.2 | male   | 51  | p.Glu61Lys        | missense_variant   | 5.5E-05     | 29.6          | 0.75           | 2.4E-05      | 1.4E-05       | 2.0E-05      |  |
| 2567264                                                                  | 32.2 | male   | 44  | p.Glu61Lys        | missense_variant   | 5.5E-05     | 29.6          | 0.75           | 2.4E-05      | 1.4E-05       | 2.0E-05      |  |

|         |      |        |    |            |                  |         |      |      |         |         |         |
|---------|------|--------|----|------------|------------------|---------|------|------|---------|---------|---------|
| 2598583 | 33.2 | female | 69 | p.Glu61Lys | missense_variant | 5.5E-05 | 29.6 | 0.75 | 2.4E-05 | 1.4E-05 | 2.0E-05 |
| 3174169 | 26.5 | female | 57 | p.Glu61Lys | missense_variant | 5.5E-05 | 29.6 | 0.75 | 2.4E-05 | 1.4E-05 | 2.0E-05 |
| 3475408 | 26.1 | female | 44 | p.Glu61Lys | missense_variant | 5.5E-05 | 29.6 | 0.75 | 2.4E-05 | 1.4E-05 | 2.0E-05 |
| 3668972 | 34.9 | male   | 51 | p.Glu61Lys | missense_variant | 5.5E-05 | 29.6 | 0.75 | 2.4E-05 | 1.4E-05 | 2.0E-05 |
| 3700423 | 20.2 | female | 49 | p.Glu61Lys | missense_variant | 5.5E-05 | 29.6 | 0.75 | 2.4E-05 | 1.4E-05 | 2.0E-05 |
| 4195426 | 28.8 | female | 57 | p.Glu61Lys | missense_variant | 5.5E-05 | 29.6 | 0.75 | 2.4E-05 | 1.4E-05 | 2.0E-05 |
| 4492964 | NA   | NA     | NA | p.Glu61Lys | missense_variant | 5.5E-05 | 29.6 | 0.75 | 2.4E-05 | 1.4E-05 | 2.0E-05 |
| 5322703 | 28.2 | male   | 62 | p.Glu61Lys | missense_variant | 5.5E-05 | 29.6 | 0.75 | 2.4E-05 | 1.4E-05 | 2.0E-05 |
| 5510811 | 28.7 | male   | 51 | p.Glu61Lys | missense_variant | 5.5E-05 | 29.6 | 0.75 | 2.4E-05 | 1.4E-05 | 2.0E-05 |
| 5673198 | 38.3 | female | 57 | p.Glu61Lys | missense_variant | 5.5E-05 | 29.6 | 0.75 | 2.4E-05 | 1.4E-05 | 2.0E-05 |
| 2191173 | 26.1 | female | 66 | p.Ile66Thr | missense_variant | 2.5E-06 | 29.7 | 0.82 | .       | .       | .       |
| 1094515 | 24.8 | female | 42 | p.Ala68Val | missense_variant | 2.5E-06 | 27.9 | 0.51 | .       | .       | 4.0E-06 |
| 1384458 | 33.0 | female | 56 | p.Ile69Thr | missense_variant | 4.7E-05 | 29.9 | 0.59 | .       | .       | 4.0E-06 |
| 1499128 | 25.5 | female | 64 | p.Ile69Thr | missense_variant | 4.7E-05 | 29.9 | 0.59 | .       | .       | 4.0E-06 |
| 1726939 | 26.4 | male   | 66 | p.Ile69Thr | missense_variant | 4.7E-05 | 29.9 | 0.59 | .       | .       | 4.0E-06 |
| 2244512 | 41.8 | female | 65 | p.Ile69Thr | missense_variant | 4.7E-05 | 29.9 | 0.59 | .       | .       | 4.0E-06 |
| 2288389 | 29.0 | female | 60 | p.Ile69Thr | missense_variant | 4.7E-05 | 29.9 | 0.59 | .       | .       | 4.0E-06 |
| 2386704 | 35.3 | female | 59 | p.Ile69Thr | missense_variant | 4.7E-05 | 29.9 | 0.59 | .       | .       | 4.0E-06 |
| 2561183 | 28.1 | male   | 60 | p.Ile69Thr | missense_variant | 4.7E-05 | 29.9 | 0.59 | .       | .       | 4.0E-06 |
| 2633487 | 27.6 | female | 58 | p.Ile69Thr | missense_variant | 4.7E-05 | 29.9 | 0.59 | .       | .       | 4.0E-06 |
| 3402124 | 31.0 | male   | 56 | p.Ile69Thr | missense_variant | 4.7E-05 | 29.9 | 0.59 | .       | .       | 4.0E-06 |
| 3524352 | 27.5 | male   | 64 | p.Ile69Thr | missense_variant | 4.7E-05 | 29.9 | 0.59 | .       | .       | 4.0E-06 |
| 3538424 | 32.7 | female | 46 | p.Ile69Thr | missense_variant | 4.7E-05 | 29.9 | 0.59 | .       | .       | 4.0E-06 |
| 4212719 | 27.8 | female | 67 | p.Ile69Thr | missense_variant | 4.7E-05 | 29.9 | 0.59 | .       | .       | 4.0E-06 |
| 4303560 | NA   | NA     | NA | p.Ile69Thr | missense_variant | 4.7E-05 | 29.9 | 0.59 | .       | .       | 4.0E-06 |
| 4947078 | 48.5 | male   | 59 | p.Ile69Thr | missense_variant | 4.7E-05 | 29.9 | 0.59 | .       | .       | 4.0E-06 |
| 5415758 | 31.5 | female | 65 | p.Ile69Thr | missense_variant | 4.7E-05 | 29.9 | 0.59 | .       | .       | 4.0E-06 |
| 5672319 | NA   | NA     | NA | p.Ile69Thr | missense_variant | 4.7E-05 | 29.9 | 0.59 | .       | .       | 4.0E-06 |

|         |      |        |    |            |                  |         |      |      |         |         |         |
|---------|------|--------|----|------------|------------------|---------|------|------|---------|---------|---------|
| 5850314 | 30.5 | female | 55 | p.Ile69Thr | missense_variant | 4.7E-05 | 29.9 | 0.59 | .       | .       | 4.0E-06 |
| 5993331 | 22.8 | male   | 68 | p.Ile69Thr | missense_variant | 4.7E-05 | 29.9 | 0.59 | .       | .       | 4.0E-06 |
| 5994148 | 27.2 | female | 60 | p.Ile69Thr | missense_variant | 4.7E-05 | 29.9 | 0.59 | .       | .       | 4.0E-06 |
| 2824673 | 29.5 | male   | 59 | p.Asn72Ser | missense_variant | 1.7E-05 | 25.4 | 0.42 | .       | 7.0E-06 | 8.0E-06 |
| 4613880 | 24.7 | female | 58 | p.Asn72Ser | missense_variant | 1.7E-05 | 25.4 | 0.42 | .       | 7.0E-06 | 8.0E-06 |
| 4621310 | 33.1 | female | 58 | p.Asn72Ser | missense_variant | 1.7E-05 | 25.4 | 0.42 | .       | 7.0E-06 | 8.0E-06 |
| 4972022 | 46.6 | female | 55 | p.Asn72Ser | missense_variant | 1.7E-05 | 25.4 | 0.42 | .       | 7.0E-06 | 8.0E-06 |
| 5150061 | 25.1 | female | 62 | p.Asn72Ser | missense_variant | 1.7E-05 | 25.4 | 0.42 | .       | 7.0E-06 | 8.0E-06 |
| 5415010 | 27.5 | female | 62 | p.Asn72Ser | missense_variant | 1.7E-05 | 25.4 | 0.42 | .       | 7.0E-06 | 8.0E-06 |
| 5758971 | 44.0 | female | 52 | p.Asn72Ser | missense_variant | 1.7E-05 | 25.4 | 0.42 | .       | 7.0E-06 | 8.0E-06 |
| 1683286 | 26.5 | male   | 42 | p.His76Arg | missense_variant | 5.7E-05 | 25.8 | 0.71 | 4.0E-05 | 7.0E-05 | 2.0E-05 |
| 1841134 | NA   | NA     | NA | p.His76Arg | missense_variant | 5.7E-05 | 25.8 | 0.71 | 4.0E-05 | 7.0E-05 | 2.0E-05 |
| 1969867 | 28.9 | female | 60 | p.His76Arg | missense_variant | 5.7E-05 | 25.8 | 0.71 | 4.0E-05 | 7.0E-05 | 2.0E-05 |
| 2173541 | 29.4 | female | 51 | p.His76Arg | missense_variant | 5.7E-05 | 25.8 | 0.71 | 4.0E-05 | 7.0E-05 | 2.0E-05 |
| 3156505 | 24.1 | female | 44 | p.His76Arg | missense_variant | 5.7E-05 | 25.8 | 0.71 | 4.0E-05 | 7.0E-05 | 2.0E-05 |
| 3326785 | 29.0 | male   | 55 | p.His76Arg | missense_variant | 5.7E-05 | 25.8 | 0.71 | 4.0E-05 | 7.0E-05 | 2.0E-05 |
| 3348406 | 22.2 | male   | 41 | p.His76Arg | missense_variant | 5.7E-05 | 25.8 | 0.71 | 4.0E-05 | 7.0E-05 | 2.0E-05 |
| 3645221 | NA   | NA     | NA | p.His76Arg | missense_variant | 5.7E-05 | 25.8 | 0.71 | 4.0E-05 | 7.0E-05 | 2.0E-05 |
| 3846756 | 23.5 | female | 43 | p.His76Arg | missense_variant | 5.7E-05 | 25.8 | 0.71 | 4.0E-05 | 7.0E-05 | 2.0E-05 |
| 3881159 | 40.8 | female | 62 | p.His76Arg | missense_variant | 5.7E-05 | 25.8 | 0.71 | 4.0E-05 | 7.0E-05 | 2.0E-05 |
| 3908576 | 25.1 | male   | 69 | p.His76Arg | missense_variant | 5.7E-05 | 25.8 | 0.71 | 4.0E-05 | 7.0E-05 | 2.0E-05 |
| 3922382 | 24.6 | female | 68 | p.His76Arg | missense_variant | 5.7E-05 | 25.8 | 0.71 | 4.0E-05 | 7.0E-05 | 2.0E-05 |
| 3961449 | NA   | male   | 69 | p.His76Arg | missense_variant | 5.7E-05 | 25.8 | 0.71 | 4.0E-05 | 7.0E-05 | 2.0E-05 |
| 4294073 | 25.9 | male   | 55 | p.His76Arg | missense_variant | 5.7E-05 | 25.8 | 0.71 | 4.0E-05 | 7.0E-05 | 2.0E-05 |
| 4716868 | 28.2 | female | 60 | p.His76Arg | missense_variant | 5.7E-05 | 25.8 | 0.71 | 4.0E-05 | 7.0E-05 | 2.0E-05 |
| 4739507 | 20.3 | female | 62 | p.His76Arg | missense_variant | 5.7E-05 | 25.8 | 0.71 | 4.0E-05 | 7.0E-05 | 2.0E-05 |
| 4964816 | 33.6 | female | 55 | p.His76Arg | missense_variant | 5.7E-05 | 25.8 | 0.71 | 4.0E-05 | 7.0E-05 | 2.0E-05 |
| 5205380 | NA   | NA     | NA | p.His76Arg | missense_variant | 5.7E-05 | 25.8 | 0.71 | 4.0E-05 | 7.0E-05 | 2.0E-05 |

|         |      |        |    |             |                  |         |      |      |         |         |         |
|---------|------|--------|----|-------------|------------------|---------|------|------|---------|---------|---------|
| 5314657 | 22.0 | male   | 59 | p.His76Arg  | missense_variant | 5.7E-05 | 25.8 | 0.71 | 4.0E-05 | 7.0E-05 | 2.0E-05 |
| 5324120 | 30.7 | male   | 59 | p.His76Arg  | missense_variant | 5.7E-05 | 25.8 | 0.71 | 4.0E-05 | 7.0E-05 | 2.0E-05 |
| 5697734 | NA   | NA     | NA | p.His76Arg  | missense_variant | 5.7E-05 | 25.8 | 0.71 | 4.0E-05 | 7.0E-05 | 2.0E-05 |
| 5745263 | 30.5 | male   | 59 | p.His76Arg  | missense_variant | 5.7E-05 | 25.8 | 0.71 | 4.0E-05 | 7.0E-05 | 2.0E-05 |
| 5886872 | 29.3 | female | 58 | p.His76Arg  | missense_variant | 5.7E-05 | 25.8 | 0.71 | 4.0E-05 | 7.0E-05 | 2.0E-05 |
| 2679542 | NA   | NA     | NA | p.Met79Ile  | missense_variant | 5.0E-06 | 25   | 0.61 | .       | .       | 4.0E-06 |
| 4237573 | 35.8 | female | 59 | p.Met79Ile  | missense_variant | 5.0E-06 | 25   | 0.61 | .       | .       | 4.0E-06 |
| 1441982 | 29.5 | female | 48 | p.Tyr80Cys  | missense_variant | 1.7E-05 | 28.5 | 0.72 | .       | 7.0E-06 | .       |
| 2379973 | NA   | NA     | NA | p.Tyr80Cys  | missense_variant | 1.7E-05 | 28.5 | 0.72 | .       | 7.0E-06 | .       |
| 3268201 | 19.0 | female | 40 | p.Tyr80Cys  | missense_variant | 1.7E-05 | 28.5 | 0.72 | .       | 7.0E-06 | .       |
| 3584926 | 30.7 | male   | 61 | p.Tyr80Cys  | missense_variant | 1.7E-05 | 28.5 | 0.72 | .       | 7.0E-06 | .       |
| 4507572 | 30.0 | female | 63 | p.Tyr80Cys  | missense_variant | 1.7E-05 | 28.5 | 0.72 | .       | 7.0E-06 | .       |
| 4519704 | 26.6 | male   | 47 | p.Tyr80Cys  | missense_variant | 1.7E-05 | 28.5 | 0.72 | .       | 7.0E-06 | .       |
| 4649042 | 28.1 | male   | 60 | p.Tyr80Cys  | missense_variant | 1.7E-05 | 28.5 | 0.72 | .       | 7.0E-06 | .       |
| 1664363 | 23.5 | male   | 67 | p.Leu92Val  | missense_variant | 7.5E-06 | 23.9 | 0.38 | .       | .       | .       |
| 2779040 | 32.5 | female | 58 | p.Leu92Val  | missense_variant | 7.5E-06 | 23.9 | 0.38 | .       | .       | .       |
| 5158191 | NA   | male   | 41 | p.Leu92Val  | missense_variant | 7.5E-06 | 23.9 | 0.38 | .       | .       | .       |
| 1019170 | 34.3 | female | 64 | p.Ser94Asn  | missense_variant | 2.5E-06 | 27.3 | 0.52 | .       | .       | 8.0E-06 |
| 2051276 | 33.1 | male   | 51 | p.Gly98Glu  | missense_variant | 2.5E-06 | 24   | 0.39 | .       | .       | .       |
| 1325432 | 37.3 | male   | 63 | p.Ile102Thr | missense_variant | 2.2E-05 | 26.1 | 0.56 | .       | .       | 4.0E-06 |
| 1746820 | 31.0 | male   | 61 | p.Ile102Thr | missense_variant | 2.2E-05 | 26.1 | 0.56 | .       | .       | 4.0E-06 |
| 1815760 | 26.4 | female | 61 | p.Ile102Thr | missense_variant | 2.2E-05 | 26.1 | 0.56 | .       | .       | 4.0E-06 |
| 2318512 | 23.0 | female | 47 | p.Ile102Thr | missense_variant | 2.2E-05 | 26.1 | 0.56 | .       | .       | 4.0E-06 |
| 3777092 | 26.1 | male   | 60 | p.Ile102Thr | missense_variant | 2.2E-05 | 26.1 | 0.56 | .       | .       | 4.0E-06 |
| 3796287 | 32.1 | male   | 60 | p.Ile102Thr | missense_variant | 2.2E-05 | 26.1 | 0.56 | .       | .       | 4.0E-06 |
| 4290735 | 33.9 | female | 49 | p.Ile102Thr | missense_variant | 2.2E-05 | 26.1 | 0.56 | .       | .       | 4.0E-06 |
| 5502107 | NA   | NA     | NA | p.Ile102Thr | missense_variant | 2.2E-05 | 26.1 | 0.56 | .       | .       | 4.0E-06 |
| 5577146 | 23.1 | female | 41 | p.Ile102Thr | missense_variant | 2.2E-05 | 26.1 | 0.56 | .       | .       | 4.0E-06 |

|         |      |        |    |                    |                    |         |      |      |         |         |         |
|---------|------|--------|----|--------------------|--------------------|---------|------|------|---------|---------|---------|
| 4926416 | 32.9 | female | 54 | p.Ile102Asn        | missense_variant   | 2.5E-06 | 32   | 0.55 | .       | .       | .       |
| 1400304 | 28.7 | female | 57 | p.Thr112AsnfsTer11 | frameshift_variant | 7.5E-06 | .    | .    | .       | .       | .       |
| 3971018 | NA   | NA     | NA | p.Thr112AsnfsTer11 | frameshift_variant | 7.5E-06 | .    | .    | .       | .       | .       |
| 5285585 | 42.6 | female | 47 | p.Thr112AsnfsTer11 | frameshift_variant | 7.5E-06 | .    | .    | .       | .       | .       |
| 1986115 | 33.4 | male   | 56 | p.Gln115GlufsTer7  | frameshift_variant | 1.7E-05 | .    | .    | .       | .       | 4.0E-06 |
| 3131891 | 42.1 | male   | 53 | p.Gln115GlufsTer7  | frameshift_variant | 1.7E-05 | .    | .    | .       | .       | 4.0E-06 |
| 4202748 | 23.6 | female | 46 | p.Gln115GlufsTer7  | frameshift_variant | 1.7E-05 | .    | .    | .       | .       | 4.0E-06 |
| 4455938 | 28.3 | male   | 49 | p.Gln115GlufsTer7  | frameshift_variant | 1.7E-05 | .    | .    | .       | .       | 4.0E-06 |
| 4513989 | 31.8 | male   | 64 | p.Gln115GlufsTer7  | frameshift_variant | 1.7E-05 | .    | .    | .       | .       | 4.0E-06 |
| 4599234 | 32.0 | male   | 41 | p.Gln115GlufsTer7  | frameshift_variant | 1.7E-05 | .    | .    | .       | .       | 4.0E-06 |
| 5303129 | 25.2 | female | 54 | p.Gln115GlufsTer7  | frameshift_variant | 1.7E-05 | .    | .    | .       | .       | 4.0E-06 |
| 3366000 | 32.4 | female | 47 | p.Ser116PhefsTer6  | frameshift_variant | 2.5E-06 | .    | .    | 8.0E-06 | 7.0E-06 | .       |
| 2997197 | 27.3 | male   | 60 | p.Asp122Tyr        | missense_variant   | 2.5E-06 | 29.4 | 0.68 | .       | .       | .       |
| 1014576 | 34.0 | female | 62 | p.Asn123Ser        | missense_variant   | 1.2E-04 | 25.8 | 0.42 | 2.4E-05 | 2.8E-05 | 2.8E-05 |
| 1149240 | NA   | male   | 40 | p.Asn123Ser        | missense_variant   | 1.2E-04 | 25.8 | 0.42 | 2.4E-05 | 2.8E-05 | 2.8E-05 |
| 1173813 | 35.2 | female | 51 | p.Asn123Ser        | missense_variant   | 1.2E-04 | 25.8 | 0.42 | 2.4E-05 | 2.8E-05 | 2.8E-05 |
| 1204357 | 24.7 | female | 68 | p.Asn123Ser        | missense_variant   | 1.2E-04 | 25.8 | 0.42 | 2.4E-05 | 2.8E-05 | 2.8E-05 |
| 1318559 | 28.3 | male   | 43 | p.Asn123Ser        | missense_variant   | 1.2E-04 | 25.8 | 0.42 | 2.4E-05 | 2.8E-05 | 2.8E-05 |
| 1337726 | NA   | NA     | NA | p.Asn123Ser        | missense_variant   | 1.2E-04 | 25.8 | 0.42 | 2.4E-05 | 2.8E-05 | 2.8E-05 |
| 1438116 | 38.6 | female | 58 | p.Asn123Ser        | missense_variant   | 1.2E-04 | 25.8 | 0.42 | 2.4E-05 | 2.8E-05 | 2.8E-05 |
| 1578614 | NA   | NA     | NA | p.Asn123Ser        | missense_variant   | 1.2E-04 | 25.8 | 0.42 | 2.4E-05 | 2.8E-05 | 2.8E-05 |
| 1586480 | 37.7 | male   | 60 | p.Asn123Ser        | missense_variant   | 1.2E-04 | 25.8 | 0.42 | 2.4E-05 | 2.8E-05 | 2.8E-05 |
| 1913306 | 23.5 | male   | 64 | p.Asn123Ser        | missense_variant   | 1.2E-04 | 25.8 | 0.42 | 2.4E-05 | 2.8E-05 | 2.8E-05 |
| 1972182 | 31.7 | male   | 68 | p.Asn123Ser        | missense_variant   | 1.2E-04 | 25.8 | 0.42 | 2.4E-05 | 2.8E-05 | 2.8E-05 |
| 2106186 | 32.1 | male   | 44 | p.Asn123Ser        | missense_variant   | 1.2E-04 | 25.8 | 0.42 | 2.4E-05 | 2.8E-05 | 2.8E-05 |
| 2278231 | 21.0 | male   | 61 | p.Asn123Ser        | missense_variant   | 1.2E-04 | 25.8 | 0.42 | 2.4E-05 | 2.8E-05 | 2.8E-05 |
| 2354052 | 40.6 | male   | 67 | p.Asn123Ser        | missense_variant   | 1.2E-04 | 25.8 | 0.42 | 2.4E-05 | 2.8E-05 | 2.8E-05 |
| 2406181 | 27.8 | male   | 44 | p.Asn123Ser        | missense_variant   | 1.2E-04 | 25.8 | 0.42 | 2.4E-05 | 2.8E-05 | 2.8E-05 |



|         |      |        |    |             |                  |         |      |      |         |         |         |
|---------|------|--------|----|-------------|------------------|---------|------|------|---------|---------|---------|
| 2593179 | NA   | NA     | NA | p.Asn123Ser | missense_variant | 1.2E-04 | 25.8 | 0.42 | 2.4E-05 | 2.8E-05 | 2.8E-05 |
| 2642762 | 23.1 | female | 49 | p.Asn123Ser | missense_variant | 1.2E-04 | 25.8 | 0.42 | 2.4E-05 | 2.8E-05 | 2.8E-05 |
| 2891734 | 27.8 | male   | 55 | p.Asn123Ser | missense_variant | 1.2E-04 | 25.8 | 0.42 | 2.4E-05 | 2.8E-05 | 2.8E-05 |
| 2929220 | 27.1 | male   | 62 | p.Asn123Ser | missense_variant | 1.2E-04 | 25.8 | 0.42 | 2.4E-05 | 2.8E-05 | 2.8E-05 |
| 2977270 | 26.7 | male   | 51 | p.Asn123Ser | missense_variant | 1.2E-04 | 25.8 | 0.42 | 2.4E-05 | 2.8E-05 | 2.8E-05 |
| 3078365 | 24.5 | female | 56 | p.Asn123Ser | missense_variant | 1.2E-04 | 25.8 | 0.42 | 2.4E-05 | 2.8E-05 | 2.8E-05 |
| 3123351 | 29.5 | male   | 67 | p.Asn123Ser | missense_variant | 1.2E-04 | 25.8 | 0.42 | 2.4E-05 | 2.8E-05 | 2.8E-05 |
| 3289867 | 27.7 | male   | 56 | p.Asn123Ser | missense_variant | 1.2E-04 | 25.8 | 0.42 | 2.4E-05 | 2.8E-05 | 2.8E-05 |
| 3326704 | 24.2 | male   | 42 | p.Asn123Ser | missense_variant | 1.2E-04 | 25.8 | 0.42 | 2.4E-05 | 2.8E-05 | 2.8E-05 |
| 3554598 | 24.9 | female | 61 | p.Asn123Ser | missense_variant | 1.2E-04 | 25.8 | 0.42 | 2.4E-05 | 2.8E-05 | 2.8E-05 |
| 3593439 | 33.2 | female | 69 | p.Asn123Ser | missense_variant | 1.2E-04 | 25.8 | 0.42 | 2.4E-05 | 2.8E-05 | 2.8E-05 |
| 3776941 | 24.5 | female | 69 | p.Asn123Ser | missense_variant | 1.2E-04 | 25.8 | 0.42 | 2.4E-05 | 2.8E-05 | 2.8E-05 |
| 3841014 | 28.8 | female | 66 | p.Asn123Ser | missense_variant | 1.2E-04 | 25.8 | 0.42 | 2.4E-05 | 2.8E-05 | 2.8E-05 |
| 3884296 | 23.4 | female | 56 | p.Asn123Ser | missense_variant | 1.2E-04 | 25.8 | 0.42 | 2.4E-05 | 2.8E-05 | 2.8E-05 |
| 3899889 | NA   | NA     | NA | p.Asn123Ser | missense_variant | 1.2E-04 | 25.8 | 0.42 | 2.4E-05 | 2.8E-05 | 2.8E-05 |
| 3996263 | 36.8 | female | 48 | p.Asn123Ser | missense_variant | 1.2E-04 | 25.8 | 0.42 | 2.4E-05 | 2.8E-05 | 2.8E-05 |
| 4009102 | 25.7 | male   | 65 | p.Asn123Ser | missense_variant | 1.2E-04 | 25.8 | 0.42 | 2.4E-05 | 2.8E-05 | 2.8E-05 |
| 4192282 | 25.3 | female | 57 | p.Asn123Ser | missense_variant | 1.2E-04 | 25.8 | 0.42 | 2.4E-05 | 2.8E-05 | 2.8E-05 |
| 4454101 | 25.4 | male   | 43 | p.Asn123Ser | missense_variant | 1.2E-04 | 25.8 | 0.42 | 2.4E-05 | 2.8E-05 | 2.8E-05 |
| 4608125 | 29.2 | male   | 66 | p.Asn123Ser | missense_variant | 1.2E-04 | 25.8 | 0.42 | 2.4E-05 | 2.8E-05 | 2.8E-05 |
| 4648134 | 32.5 | male   | 51 | p.Asn123Ser | missense_variant | 1.2E-04 | 25.8 | 0.42 | 2.4E-05 | 2.8E-05 | 2.8E-05 |
| 4682485 | 33.2 | female | 46 | p.Asn123Ser | missense_variant | 1.2E-04 | 25.8 | 0.42 | 2.4E-05 | 2.8E-05 | 2.8E-05 |
| 4747106 | 24.9 | female | 59 | p.Asn123Ser | missense_variant | 1.2E-04 | 25.8 | 0.42 | 2.4E-05 | 2.8E-05 | 2.8E-05 |
| 5012941 | 31.0 | female | 61 | p.Asn123Ser | missense_variant | 1.2E-04 | 25.8 | 0.42 | 2.4E-05 | 2.8E-05 | 2.8E-05 |
| 5069288 | 24.3 | male   | 66 | p.Asn123Ser | missense_variant | 1.2E-04 | 25.8 | 0.42 | 2.4E-05 | 2.8E-05 | 2.8E-05 |
| 5173413 | 30.1 | female | 59 | p.Asn123Ser | missense_variant | 1.2E-04 | 25.8 | 0.42 | 2.4E-05 | 2.8E-05 | 2.8E-05 |
| 5322011 | 19.0 | female | 55 | p.Asn123Ser | missense_variant | 1.2E-04 | 25.8 | 0.42 | 2.4E-05 | 2.8E-05 | 2.8E-05 |
| 5447107 | 29.5 | female | 65 | p.Asn123Ser | missense_variant | 1.2E-04 | 25.8 | 0.42 | 2.4E-05 | 2.8E-05 | 2.8E-05 |

|         |      |        |    |             |                  |         |      |      |         |         |         |
|---------|------|--------|----|-------------|------------------|---------|------|------|---------|---------|---------|
| 5464157 | 25.6 | male   | 53 | p.Asn123Ser | missense_variant | 1.2E-04 | 25.8 | 0.42 | 2.4E-05 | 2.8E-05 | 2.8E-05 |
| 5542879 | 27.5 | male   | 65 | p.Asn123Ser | missense_variant | 1.2E-04 | 25.8 | 0.42 | 2.4E-05 | 2.8E-05 | 2.8E-05 |
| 5738528 | 30.0 | male   | 66 | p.Asn123Ser | missense_variant | 1.2E-04 | 25.8 | 0.42 | 2.4E-05 | 2.8E-05 | 2.8E-05 |
| 5931648 | 25.4 | female | 47 | p.Asn123Ser | missense_variant | 1.2E-04 | 25.8 | 0.42 | 2.4E-05 | 2.8E-05 | 2.8E-05 |
| 1806252 | 34.4 | male   | 59 | p.Ile125Asn | missense_variant | 2.2E-05 | 32   | 0.48 | .       | .       | .       |
| 2328999 | 41.4 | male   | 52 | p.Ile125Asn | missense_variant | 2.2E-05 | 32   | 0.48 | .       | .       | .       |
| 2477917 | 41.2 | male   | 44 | p.Ile125Asn | missense_variant | 2.2E-05 | 32   | 0.48 | .       | .       | .       |
| 2520182 | 30.4 | male   | 62 | p.Ile125Asn | missense_variant | 2.2E-05 | 32   | 0.48 | .       | .       | .       |
| 3805024 | NA   | NA     | NA | p.Ile125Asn | missense_variant | 2.2E-05 | 32   | 0.48 | .       | .       | .       |
| 4398805 | 23.9 | male   | 57 | p.Ile125Asn | missense_variant | 2.2E-05 | 32   | 0.48 | .       | .       | .       |
| 4518658 | 48.6 | male   | 53 | p.Ile125Asn | missense_variant | 2.2E-05 | 32   | 0.48 | .       | .       | .       |
| 5395965 | 20.7 | female | 68 | p.Ile125Asn | missense_variant | 2.2E-05 | 32   | 0.48 | .       | .       | .       |
| 5637159 | 32.4 | male   | 61 | p.Ile125Asn | missense_variant | 2.2E-05 | 32   | 0.48 | .       | .       | .       |
| 5352750 | 22.0 | female | 63 | p.Cys130Trp | missense_variant | 2.5E-06 | 27.6 | 0.45 | .       | .       | .       |
| 1957427 | 35.0 | female | 54 | p.Ser136Pro | missense_variant | 1.5E-05 | 25.4 | 0.75 | .       | .       | .       |
| 3423718 | NA   | NA     | NA | p.Ser136Pro | missense_variant | 1.5E-05 | 25.4 | 0.75 | .       | .       | .       |
| 3468428 | 30.3 | male   | 58 | p.Ser136Pro | missense_variant | 1.5E-05 | 25.4 | 0.75 | .       | .       | .       |
| 4967648 | 25.3 | male   | 64 | p.Ser136Pro | missense_variant | 1.5E-05 | 25.4 | 0.75 | .       | .       | .       |
| 5505751 | 33.6 | male   | 50 | p.Ser136Pro | missense_variant | 1.5E-05 | 25.4 | 0.75 | .       | .       | .       |
| 5556039 | NA   | NA     | NA | p.Ser136Pro | missense_variant | 1.5E-05 | 25.4 | 0.75 | .       | .       | .       |
| 2604288 | NA   | NA     | NA | p.Ser136Phe | missense_variant | 2.5E-06 | 28.1 | 0.62 | .       | 7.0E-06 | .       |
| 1100507 | 34.0 | female | 49 | p.Ile137Thr | missense_variant | 9.0E-05 | 26.8 | 0.53 | 4.0E-05 | 2.8E-05 | 2.4E-05 |
| 1317870 | 26.2 | female | 55 | p.Ile137Thr | missense_variant | 9.0E-05 | 26.8 | 0.53 | 4.0E-05 | 2.8E-05 | 2.4E-05 |
| 1506789 | 26.6 | female | 50 | p.Ile137Thr | missense_variant | 9.0E-05 | 26.8 | 0.53 | 4.0E-05 | 2.8E-05 | 2.4E-05 |
| 1617392 | NA   | NA     | NA | p.Ile137Thr | missense_variant | 9.0E-05 | 26.8 | 0.53 | 4.0E-05 | 2.8E-05 | 2.4E-05 |
| 1756981 | 28.8 | male   | 40 | p.Ile137Thr | missense_variant | 9.0E-05 | 26.8 | 0.53 | 4.0E-05 | 2.8E-05 | 2.4E-05 |
| 1761184 | 32.5 | female | 60 | p.Ile137Thr | missense_variant | 9.0E-05 | 26.8 | 0.53 | 4.0E-05 | 2.8E-05 | 2.4E-05 |
| 1938965 | 29.2 | female | 58 | p.Ile137Thr | missense_variant | 9.0E-05 | 26.8 | 0.53 | 4.0E-05 | 2.8E-05 | 2.4E-05 |

|         |      |        |    |             |                  |         |      |      |         |         |         |
|---------|------|--------|----|-------------|------------------|---------|------|------|---------|---------|---------|
| 1999428 | 35.9 | female | 62 | p.Ile137Thr | missense_variant | 9.0E-05 | 26.8 | 0.53 | 4.0E-05 | 2.8E-05 | 2.4E-05 |
| 2327116 | 23.7 | female | 45 | p.Ile137Thr | missense_variant | 9.0E-05 | 26.8 | 0.53 | 4.0E-05 | 2.8E-05 | 2.4E-05 |
| 2996339 | 23.7 | male   | 41 | p.Ile137Thr | missense_variant | 9.0E-05 | 26.8 | 0.53 | 4.0E-05 | 2.8E-05 | 2.4E-05 |
| 3083837 | NA   | NA     | NA | p.Ile137Thr | missense_variant | 9.0E-05 | 26.8 | 0.53 | 4.0E-05 | 2.8E-05 | 2.4E-05 |
| 3259296 | 21.3 | male   | 56 | p.Ile137Thr | missense_variant | 9.0E-05 | 26.8 | 0.53 | 4.0E-05 | 2.8E-05 | 2.4E-05 |
| 3323996 | NA   | NA     | NA | p.Ile137Thr | missense_variant | 9.0E-05 | 26.8 | 0.53 | 4.0E-05 | 2.8E-05 | 2.4E-05 |
| 3393887 | 21.8 | male   | 64 | p.Ile137Thr | missense_variant | 9.0E-05 | 26.8 | 0.53 | 4.0E-05 | 2.8E-05 | 2.4E-05 |
| 3432813 | 35.5 | male   | 59 | p.Ile137Thr | missense_variant | 9.0E-05 | 26.8 | 0.53 | 4.0E-05 | 2.8E-05 | 2.4E-05 |
| 3453153 | NA   | NA     | NA | p.Ile137Thr | missense_variant | 9.0E-05 | 26.8 | 0.53 | 4.0E-05 | 2.8E-05 | 2.4E-05 |
| 3701636 | 23.1 | male   | 60 | p.Ile137Thr | missense_variant | 9.0E-05 | 26.8 | 0.53 | 4.0E-05 | 2.8E-05 | 2.4E-05 |
| 3805267 | 23.4 | female | 50 | p.Ile137Thr | missense_variant | 9.0E-05 | 26.8 | 0.53 | 4.0E-05 | 2.8E-05 | 2.4E-05 |
| 3925891 | 33.5 | male   | 60 | p.Ile137Thr | missense_variant | 9.0E-05 | 26.8 | 0.53 | 4.0E-05 | 2.8E-05 | 2.4E-05 |
| 4430865 | 27.7 | female | 61 | p.Ile137Thr | missense_variant | 9.0E-05 | 26.8 | 0.53 | 4.0E-05 | 2.8E-05 | 2.4E-05 |
| 4478104 | 23.8 | male   | 56 | p.Ile137Thr | missense_variant | 9.0E-05 | 26.8 | 0.53 | 4.0E-05 | 2.8E-05 | 2.4E-05 |
| 4676225 | 28.6 | female | 45 | p.Ile137Thr | missense_variant | 9.0E-05 | 26.8 | 0.53 | 4.0E-05 | 2.8E-05 | 2.4E-05 |
| 4717645 | NA   | NA     | NA | p.Ile137Thr | missense_variant | 9.0E-05 | 26.8 | 0.53 | 4.0E-05 | 2.8E-05 | 2.4E-05 |
| 4754233 | 34.5 | female | 69 | p.Ile137Thr | missense_variant | 9.0E-05 | 26.8 | 0.53 | 4.0E-05 | 2.8E-05 | 2.4E-05 |
| 4837703 | 30.0 | female | 42 | p.Ile137Thr | missense_variant | 9.0E-05 | 26.8 | 0.53 | 4.0E-05 | 2.8E-05 | 2.4E-05 |
| 4945627 | 29.2 | female | 44 | p.Ile137Thr | missense_variant | 9.0E-05 | 26.8 | 0.53 | 4.0E-05 | 2.8E-05 | 2.4E-05 |
| 5028712 | 27.5 | female | 63 | p.Ile137Thr | missense_variant | 9.0E-05 | 26.8 | 0.53 | 4.0E-05 | 2.8E-05 | 2.4E-05 |
| 5083430 | 31.2 | female | 47 | p.Ile137Thr | missense_variant | 9.0E-05 | 26.8 | 0.53 | 4.0E-05 | 2.8E-05 | 2.4E-05 |
| 5092839 | 38.5 | male   | 42 | p.Ile137Thr | missense_variant | 9.0E-05 | 26.8 | 0.53 | 4.0E-05 | 2.8E-05 | 2.4E-05 |
| 5133434 | 31.8 | female | 67 | p.Ile137Thr | missense_variant | 9.0E-05 | 26.8 | 0.53 | 4.0E-05 | 2.8E-05 | 2.4E-05 |
| 5507645 | 22.9 | female | 62 | p.Ile137Thr | missense_variant | 9.0E-05 | 26.8 | 0.53 | 4.0E-05 | 2.8E-05 | 2.4E-05 |
| 5574044 | 21.3 | female | 52 | p.Ile137Thr | missense_variant | 9.0E-05 | 26.8 | 0.53 | 4.0E-05 | 2.8E-05 | 2.4E-05 |
| 5600363 | 24.9 | male   | 63 | p.Ile137Thr | missense_variant | 9.0E-05 | 26.8 | 0.53 | 4.0E-05 | 2.8E-05 | 2.4E-05 |
| 5677778 | 24.5 | male   | 42 | p.Ile137Thr | missense_variant | 9.0E-05 | 26.8 | 0.53 | 4.0E-05 | 2.8E-05 | 2.4E-05 |
| 5779471 | 36.9 | female | 62 | p.Ile137Thr | missense_variant | 9.0E-05 | 26.8 | 0.53 | 4.0E-05 | 2.8E-05 | 2.4E-05 |

|         |      |        |    |                    |                    |         |      |      |         |         |         |
|---------|------|--------|----|--------------------|--------------------|---------|------|------|---------|---------|---------|
| 5808264 | 28.2 | female | 59 | p.Ile137Thr        | missense_variant   | 9.0E-05 | 26.8 | 0.53 | 4.0E-05 | 2.8E-05 | 2.4E-05 |
| 1143230 | 31.1 | male   | 61 | p.Cys138Phe        | missense_variant   | 2.5E-06 | 24.2 | 0.45 | .       | .       | 4.0E-06 |
| 4905816 | 47.4 | female | 47 | p.Val145Ala        | missense_variant   | 2.5E-06 | 26.3 | 0.42 | .       | .       | 4.0E-06 |
| 1190778 | 28.3 | male   | 57 | p.Asp146Ala        | missense_variant   | 2.5E-06 | 28.6 | 0.87 | .       | .       | .       |
| 3710129 | 28.8 | male   | 62 | p.Asp146Gly        | missense_variant   | 2.5E-06 | 28.8 | 0.92 | .       | .       | .       |
| 3805957 | 44.3 | female | 57 | p.Asp146LeufsTer11 | frameshift_variant | 2.5E-06 | .    | .    | .       | .       | 4.0E-06 |
| 1241066 | 26.1 | male   | 45 | p.His158Arg        | missense_variant   | 3.7E-05 | 25.6 | 0.61 | 1.6E-05 | 3.5E-05 | 4.0E-06 |
| 1380863 | 25.2 | female | 52 | p.His158Arg        | missense_variant   | 3.7E-05 | 25.6 | 0.61 | 1.6E-05 | 3.5E-05 | 4.0E-06 |
| 1384021 | 27.7 | male   | 59 | p.His158Arg        | missense_variant   | 3.7E-05 | 25.6 | 0.61 | 1.6E-05 | 3.5E-05 | 4.0E-06 |
| 1412955 | 28.5 | female | 56 | p.His158Arg        | missense_variant   | 3.7E-05 | 25.6 | 0.61 | 1.6E-05 | 3.5E-05 | 4.0E-06 |
| 1570881 | 25.8 | female | 62 | p.His158Arg        | missense_variant   | 3.7E-05 | 25.6 | 0.61 | 1.6E-05 | 3.5E-05 | 4.0E-06 |
| 1743275 | 25.3 | male   | 47 | p.His158Arg        | missense_variant   | 3.7E-05 | 25.6 | 0.61 | 1.6E-05 | 3.5E-05 | 4.0E-06 |
| 2440464 | 23.7 | male   | 68 | p.His158Arg        | missense_variant   | 3.7E-05 | 25.6 | 0.61 | 1.6E-05 | 3.5E-05 | 4.0E-06 |
| 3103870 | 30.2 | male   | 43 | p.His158Arg        | missense_variant   | 3.7E-05 | 25.6 | 0.61 | 1.6E-05 | 3.5E-05 | 4.0E-06 |
| 3644525 | NA   | NA     | NA | p.His158Arg        | missense_variant   | 3.7E-05 | 25.6 | 0.61 | 1.6E-05 | 3.5E-05 | 4.0E-06 |
| 5180932 | NA   | NA     | NA | p.His158Arg        | missense_variant   | 3.7E-05 | 25.6 | 0.61 | 1.6E-05 | 3.5E-05 | 4.0E-06 |
| 5287608 | 36.0 | male   | 62 | p.His158Arg        | missense_variant   | 3.7E-05 | 25.6 | 0.61 | 1.6E-05 | 3.5E-05 | 4.0E-06 |
| 5307414 | 24.9 | female | 53 | p.His158Arg        | missense_variant   | 3.7E-05 | 25.6 | 0.61 | 1.6E-05 | 3.5E-05 | 4.0E-06 |
| 5357498 | 23.5 | male   | 45 | p.His158Arg        | missense_variant   | 3.7E-05 | 25.6 | 0.61 | 1.6E-05 | 3.5E-05 | 4.0E-06 |
| 5556183 | 19.3 | female | 63 | p.His158Arg        | missense_variant   | 3.7E-05 | 25.6 | 0.61 | 1.6E-05 | 3.5E-05 | 4.0E-06 |
| 5736298 | 20.0 | female | 46 | p.His158Arg        | missense_variant   | 3.7E-05 | 25.6 | 0.61 | 1.6E-05 | 3.5E-05 | 4.0E-06 |
| 3968759 | NA   | NA     | NA | p.Ile160Val        | missense_variant   | 2.5E-06 | 27.4 | 0.37 | .       | .       | .       |
| 1249021 | 22.4 | female | 57 | p.Met161Thr        | missense_variant   | 5.0E-06 | 28.4 | 0.49 | .       | .       | 4.0E-06 |
| 4523416 | NA   | NA     | NA | p.Met161Thr        | missense_variant   | 5.0E-06 | 28.4 | 0.49 | .       | .       | 4.0E-06 |
| 1054215 | 30.9 | female | 65 | p.Arg165Trp        | missense_variant   | 5.0E-05 | 31   | 0.50 | .       | 1.4E-05 | 2.0E-05 |
| 1176128 | 27.9 | male   | 47 | p.Arg165Trp        | missense_variant   | 5.0E-05 | 31   | 0.50 | .       | 1.4E-05 | 2.0E-05 |
| 1193660 | 37.8 | female | 60 | p.Arg165Trp        | missense_variant   | 5.0E-05 | 31   | 0.50 | .       | 1.4E-05 | 2.0E-05 |
| 1622359 | NA   | NA     | NA | p.Arg165Trp        | missense_variant   | 5.0E-05 | 31   | 0.50 | .       | 1.4E-05 | 2.0E-05 |

|         |      |        |    |             |                  |         |    |      |         |         |         |
|---------|------|--------|----|-------------|------------------|---------|----|------|---------|---------|---------|
| 1728366 | 23.9 | female | 45 | p.Arg165Trp | missense_variant | 5.0E-05 | 31 | 0.50 | .       | 1.4E-05 | 2.0E-05 |
| 2405729 | 30.7 | male   | 61 | p.Arg165Trp | missense_variant | 5.0E-05 | 31 | 0.50 | .       | 1.4E-05 | 2.0E-05 |
| 2500178 | 30.3 | male   | 53 | p.Arg165Trp | missense_variant | 5.0E-05 | 31 | 0.50 | .       | 1.4E-05 | 2.0E-05 |
| 2600330 | 38.2 | female | 50 | p.Arg165Trp | missense_variant | 5.0E-05 | 31 | 0.50 | .       | 1.4E-05 | 2.0E-05 |
| 2676034 | 33.7 | male   | 54 | p.Arg165Trp | missense_variant | 5.0E-05 | 31 | 0.50 | .       | 1.4E-05 | 2.0E-05 |
| 3095787 | 26.8 | male   | 64 | p.Arg165Trp | missense_variant | 5.0E-05 | 31 | 0.50 | .       | 1.4E-05 | 2.0E-05 |
| 3163934 | NA   | NA     | NA | p.Arg165Trp | missense_variant | 5.0E-05 | 31 | 0.50 | .       | 1.4E-05 | 2.0E-05 |
| 3195944 | 24.2 | female | 56 | p.Arg165Trp | missense_variant | 5.0E-05 | 31 | 0.50 | .       | 1.4E-05 | 2.0E-05 |
| 3764277 | 22.0 | male   | 46 | p.Arg165Trp | missense_variant | 5.0E-05 | 31 | 0.50 | .       | 1.4E-05 | 2.0E-05 |
| 3768536 | 29.0 | male   | 53 | p.Arg165Trp | missense_variant | 5.0E-05 | 31 | 0.50 | .       | 1.4E-05 | 2.0E-05 |
| 4907573 | 30.3 | male   | 70 | p.Arg165Trp | missense_variant | 5.0E-05 | 31 | 0.50 | .       | 1.4E-05 | 2.0E-05 |
| 5088879 | 30.8 | female | 43 | p.Arg165Trp | missense_variant | 5.0E-05 | 31 | 0.50 | .       | 1.4E-05 | 2.0E-05 |
| 5148818 | 36.1 | female | 57 | p.Arg165Trp | missense_variant | 5.0E-05 | 31 | 0.50 | .       | 1.4E-05 | 2.0E-05 |
| 5225941 | 33.6 | female | 65 | p.Arg165Trp | missense_variant | 5.0E-05 | 31 | 0.50 | .       | 1.4E-05 | 2.0E-05 |
| 5267594 | 37.4 | female | 57 | p.Arg165Trp | missense_variant | 5.0E-05 | 31 | 0.50 | .       | 1.4E-05 | 2.0E-05 |
| 5900935 | 25.6 | female | 61 | p.Arg165Trp | missense_variant | 5.0E-05 | 31 | 0.50 | .       | 1.4E-05 | 2.0E-05 |
| 1239203 | 27.9 | female | 55 | p.Arg165Gln | missense_variant | 4.2E-05 | 31 | 0.67 | 1.6E-05 | 1.4E-05 | 2.4E-05 |
| 1385148 | NA   | NA     | NA | p.Arg165Gln | missense_variant | 4.2E-05 | 31 | 0.67 | 1.6E-05 | 1.4E-05 | 2.4E-05 |
| 1406409 | 27.7 | male   | 40 | p.Arg165Gln | missense_variant | 4.2E-05 | 31 | 0.67 | 1.6E-05 | 1.4E-05 | 2.4E-05 |
| 1773490 | NA   | NA     | NA | p.Arg165Gln | missense_variant | 4.2E-05 | 31 | 0.67 | 1.6E-05 | 1.4E-05 | 2.4E-05 |
| 1800525 | 25.2 | female | 63 | p.Arg165Gln | missense_variant | 4.2E-05 | 31 | 0.67 | 1.6E-05 | 1.4E-05 | 2.4E-05 |
| 2472518 | 26.4 | female | 69 | p.Arg165Gln | missense_variant | 4.2E-05 | 31 | 0.67 | 1.6E-05 | 1.4E-05 | 2.4E-05 |
| 2573090 | 29.0 | male   | 55 | p.Arg165Gln | missense_variant | 4.2E-05 | 31 | 0.67 | 1.6E-05 | 1.4E-05 | 2.4E-05 |
| 3225956 | NA   | NA     | NA | p.Arg165Gln | missense_variant | 4.2E-05 | 31 | 0.67 | 1.6E-05 | 1.4E-05 | 2.4E-05 |
| 3567955 | 37.1 | male   | 66 | p.Arg165Gln | missense_variant | 4.2E-05 | 31 | 0.67 | 1.6E-05 | 1.4E-05 | 2.4E-05 |
| 3980563 | 24.1 | male   | 49 | p.Arg165Gln | missense_variant | 4.2E-05 | 31 | 0.67 | 1.6E-05 | 1.4E-05 | 2.4E-05 |
| 4061953 | 29.0 | female | 60 | p.Arg165Gln | missense_variant | 4.2E-05 | 31 | 0.67 | 1.6E-05 | 1.4E-05 | 2.4E-05 |
| 4743200 | 36.9 | female | 57 | p.Arg165Gln | missense_variant | 4.2E-05 | 31 | 0.67 | 1.6E-05 | 1.4E-05 | 2.4E-05 |

|         |      |        |    |                    |                    |         |      |      |         |         |         |
|---------|------|--------|----|--------------------|--------------------|---------|------|------|---------|---------|---------|
| 4867071 | 35.9 | female | 56 | p.Arg165Gln        | missense_variant   | 4.2E-05 | 31   | 0.67 | 1.6E-05 | 1.4E-05 | 2.4E-05 |
| 5030780 | 30.8 | male   | 62 | p.Arg165Gln        | missense_variant   | 4.2E-05 | 31   | 0.67 | 1.6E-05 | 1.4E-05 | 2.4E-05 |
| 5117609 | 30.5 | male   | 62 | p.Arg165Gln        | missense_variant   | 4.2E-05 | 31   | 0.67 | 1.6E-05 | 1.4E-05 | 2.4E-05 |
| 5263549 | NA   | NA     | NA | p.Arg165Gln        | missense_variant   | 4.2E-05 | 31   | 0.67 | 1.6E-05 | 1.4E-05 | 2.4E-05 |
| 6018515 | 19.4 | female | 57 | p.Arg165Gln        | missense_variant   | 4.2E-05 | 31   | 0.67 | 1.6E-05 | 1.4E-05 | 2.4E-05 |
| 5704494 | 24.8 | male   | 55 | p.Ile173Thr        | missense_variant   | 2.5E-06 | 29.4 | 0.82 | .       | .       | .       |
| 5903169 | 29.4 | male   | 63 | p.Trp174Arg        | missense_variant   | 2.5E-06 | 33   | 0.92 | .       | .       | .       |
| 2889776 | 25.7 | female | 42 | p.Ser180Pro        | missense_variant   | 1.0E-05 | 21.9 | 0.59 | 8.0E-06 | .       | 4.0E-06 |
| 3757603 | 39.8 | female | 43 | p.Ser180Pro        | missense_variant   | 1.0E-05 | 21.9 | 0.59 | 8.0E-06 | .       | 4.0E-06 |
| 3838438 | 23.9 | male   | 49 | p.Ser180Pro        | missense_variant   | 1.0E-05 | 21.9 | 0.59 | 8.0E-06 | .       | 4.0E-06 |
| 5239039 | 25.4 | male   | 62 | p.Ser180Pro        | missense_variant   | 1.0E-05 | 21.9 | 0.59 | 8.0E-06 | .       | 4.0E-06 |
| 3629050 | 26.5 | female | 67 | p.Gly181Asp        | missense_variant   | 2.5E-06 | 23.2 | 0.67 | .       | .       | 1.6E-05 |
| 2142760 | 27.3 | male   | 67 | p.Leu183Phe        | missense_variant   | 7.5E-06 | 22.3 | 0.35 | .       | .       | .       |
| 3622748 | 26.9 | male   | 66 | p.Leu183Phe        | missense_variant   | 7.5E-06 | 22.3 | 0.35 | .       | .       | .       |
| 3964567 | 28.6 | male   | 66 | p.Leu183Phe        | missense_variant   | 7.5E-06 | 22.3 | 0.35 | .       | .       | .       |
| 3155058 | 23.6 | male   | 62 | p.Phe184Ile        | missense_variant   | 5.0E-06 | 25.6 | 0.62 | .       | .       | .       |
| 4753327 | 26.4 | male   | 59 | p.Phe184Ile        | missense_variant   | 5.0E-06 | 25.6 | 0.62 | .       | .       | .       |
| 1733621 | 32.5 | female | 65 | p.Tyr187ThrfsTer31 | frameshift_variant | 2.5E-06 | .    | .    | .       | .       | 4.0E-06 |
| 4894925 | 28.6 | male   | 62 | p.Cys196Tyr        | missense_variant   | 2.5E-06 | 26.1 | 0.95 | .       | .       | 4.0E-06 |
| 2082701 | 24.9 | female | 68 | p.Met215Ile        | missense_variant   | 1.3E-05 | 25.2 | 0.43 | .       | 7.0E-06 | 8.0E-06 |
| 2241509 | 27.6 | male   | 48 | p.Met215Ile        | missense_variant   | 1.3E-05 | 25.2 | 0.43 | .       | 7.0E-06 | 8.0E-06 |
| 4064417 | 31.9 | female | 56 | p.Met215Ile        | missense_variant   | 1.3E-05 | 25.2 | 0.43 | .       | 7.0E-06 | 8.0E-06 |
| 4885862 | 32.0 | female | 61 | p.Met215Ile        | missense_variant   | 1.3E-05 | 25.2 | 0.43 | .       | 7.0E-06 | 8.0E-06 |
| 5412607 | 26.3 | male   | 43 | p.Met215Ile        | missense_variant   | 1.3E-05 | 25.2 | 0.43 | .       | 7.0E-06 | 8.0E-06 |
| 1878615 | 21.1 | male   | 61 | p.Met215Val        | missense_variant   | 5.0E-06 | 27.1 | 0.42 | .       | .       | .       |
| 1934678 | 40.7 | male   | 66 | p.Met215Val        | missense_variant   | 5.0E-06 | 27.1 | 0.42 | .       | .       | .       |
| 4857870 | 20.3 | female | 59 | p.Met218Thr        | missense_variant   | 2.5E-06 | 25.3 | 0.38 | 1.6E-05 | 7.0E-06 | 4.0E-05 |
| 3774034 | 26.7 | male   | 68 | p.Ala219Ser        | missense_variant   | 2.5E-06 | 28.2 | 0.55 | .       | .       | .       |

|         |      |        |    |                    |                    |         |      |      |         |         |         |
|---------|------|--------|----|--------------------|--------------------|---------|------|------|---------|---------|---------|
| 1642332 | 32.9 | female | 65 | p.Met241Thr        | missense_variant   | 5.0E-06 | 27.8 | 0.65 | .       | .       | .       |
| 3558939 | 30.1 | male   | 69 | p.Met241Thr        | missense_variant   | 5.0E-06 | 27.8 | 0.65 | .       | .       | .       |
| 1267284 | 26.3 | male   | 52 | p.Ala244Val        | missense_variant   | 4.0E-05 | 27.1 | 0.68 | 2.4E-05 | 2.8E-05 | 2.8E-05 |
| 1891091 | 33.5 | female | 59 | p.Ala244Val        | missense_variant   | 4.0E-05 | 27.1 | 0.68 | 2.4E-05 | 2.8E-05 | 2.8E-05 |
| 2334031 | 21.8 | female | 62 | p.Ala244Val        | missense_variant   | 4.0E-05 | 27.1 | 0.68 | 2.4E-05 | 2.8E-05 | 2.8E-05 |
| 2550476 | 25.6 | female | 65 | p.Ala244Val        | missense_variant   | 4.0E-05 | 27.1 | 0.68 | 2.4E-05 | 2.8E-05 | 2.8E-05 |
| 2681077 | 21.3 | female | 53 | p.Ala244Val        | missense_variant   | 4.0E-05 | 27.1 | 0.68 | 2.4E-05 | 2.8E-05 | 2.8E-05 |
| 2763902 | 31.7 | female | 57 | p.Ala244Val        | missense_variant   | 4.0E-05 | 27.1 | 0.68 | 2.4E-05 | 2.8E-05 | 2.8E-05 |
| 3124616 | 31.4 | female | 63 | p.Ala244Val        | missense_variant   | 4.0E-05 | 27.1 | 0.68 | 2.4E-05 | 2.8E-05 | 2.8E-05 |
| 3673556 | 23.6 | male   | 66 | p.Ala244Val        | missense_variant   | 4.0E-05 | 27.1 | 0.68 | 2.4E-05 | 2.8E-05 | 2.8E-05 |
| 3726681 | 25.4 | male   | 67 | p.Ala244Val        | missense_variant   | 4.0E-05 | 27.1 | 0.68 | 2.4E-05 | 2.8E-05 | 2.8E-05 |
| 4054380 | NA   | NA     | NA | p.Ala244Val        | missense_variant   | 4.0E-05 | 27.1 | 0.68 | 2.4E-05 | 2.8E-05 | 2.8E-05 |
| 4563640 | 27.3 | female | 54 | p.Ala244Val        | missense_variant   | 4.0E-05 | 27.1 | 0.68 | 2.4E-05 | 2.8E-05 | 2.8E-05 |
| 4672856 | 23.3 | female | 53 | p.Ala244Val        | missense_variant   | 4.0E-05 | 27.1 | 0.68 | 2.4E-05 | 2.8E-05 | 2.8E-05 |
| 4953626 | 37.0 | male   | 58 | p.Ala244Val        | missense_variant   | 4.0E-05 | 27.1 | 0.68 | 2.4E-05 | 2.8E-05 | 2.8E-05 |
| 5218978 | 27.1 | male   | 40 | p.Ala244Val        | missense_variant   | 4.0E-05 | 27.1 | 0.68 | 2.4E-05 | 2.8E-05 | 2.8E-05 |
| 5386607 | 24.2 | female | 62 | p.Ala244Val        | missense_variant   | 4.0E-05 | 27.1 | 0.68 | 2.4E-05 | 2.8E-05 | 2.8E-05 |
| 5496670 | 21.6 | female | 58 | p.Ala244Val        | missense_variant   | 4.0E-05 | 27.1 | 0.68 | 2.4E-05 | 2.8E-05 | 2.8E-05 |
| 4041245 | 33.6 | female | 62 | p.Ala244Glu        | missense_variant   | 5.0E-06 | 27   | 0.81 | 2.4E-05 | 7.0E-06 | 8.0E-06 |
| 5400068 | NA   | NA     | NA | p.Ala244Glu        | missense_variant   | 5.0E-06 | 27   | 0.81 | 2.4E-05 | 7.0E-06 | 8.0E-06 |
| 1214667 | 33.5 | male   | 69 | p.Leu250Gln        | missense_variant   | 1.7E-05 | 29.9 | 0.76 | .       | 7.0E-06 | 1.6E-05 |
| 2066279 | 27.6 | female | 61 | p.Leu250Gln        | missense_variant   | 1.7E-05 | 29.9 | 0.76 | .       | 7.0E-06 | 1.6E-05 |
| 2352734 | 23.6 | female | 52 | p.Leu250Gln        | missense_variant   | 1.7E-05 | 29.9 | 0.76 | .       | 7.0E-06 | 1.6E-05 |
| 3555130 | 23.8 | female | 52 | p.Leu250Gln        | missense_variant   | 1.7E-05 | 29.9 | 0.76 | .       | 7.0E-06 | 1.6E-05 |
| 3736171 | 23.3 | male   | 63 | p.Leu250Gln        | missense_variant   | 1.7E-05 | 29.9 | 0.76 | .       | 7.0E-06 | 1.6E-05 |
| 5110595 | 26.0 | male   | 64 | p.Leu250Gln        | missense_variant   | 1.7E-05 | 29.9 | 0.76 | .       | 7.0E-06 | 1.6E-05 |
| 5424419 | 36.7 | male   | 61 | p.Leu250Gln        | missense_variant   | 1.7E-05 | 29.9 | 0.76 | .       | 7.0E-06 | 1.6E-05 |
| 1046614 | 25.6 | male   | 62 | p.Ile251TrpfsTer34 | frameshift_variant | 3.5E-05 | .    | .    | .       | 2.8E-05 | 3.6E-05 |

|         |      |        |    |                    |                    |         |      |      |         |         |         |
|---------|------|--------|----|--------------------|--------------------|---------|------|------|---------|---------|---------|
| 1211620 | 37.1 | male   | 61 | p.Ile251TrpfsTer34 | frameshift_variant | 3.5E-05 | .    | .    | .       | 2.8E-05 | 3.6E-05 |
| 1312906 | 30.8 | male   | 58 | p.Ile251TrpfsTer34 | frameshift_variant | 3.5E-05 | .    | .    | .       | 2.8E-05 | 3.6E-05 |
| 1549731 | NA   | NA     | NA | p.Ile251TrpfsTer34 | frameshift_variant | 3.5E-05 | .    | .    | .       | 2.8E-05 | 3.6E-05 |
| 1933006 | 32.0 | male   | 61 | p.Ile251TrpfsTer34 | frameshift_variant | 3.5E-05 | .    | .    | .       | 2.8E-05 | 3.6E-05 |
| 2351823 | 31.7 | female | 62 | p.Ile251TrpfsTer34 | frameshift_variant | 3.5E-05 | .    | .    | .       | 2.8E-05 | 3.6E-05 |
| 2393054 | 33.7 | male   | 62 | p.Ile251TrpfsTer34 | frameshift_variant | 3.5E-05 | .    | .    | .       | 2.8E-05 | 3.6E-05 |
| 3155252 | 24.3 | female | 48 | p.Ile251TrpfsTer34 | frameshift_variant | 3.5E-05 | .    | .    | .       | 2.8E-05 | 3.6E-05 |
| 3255516 | 27.3 | female | 40 | p.Ile251TrpfsTer34 | frameshift_variant | 3.5E-05 | .    | .    | .       | 2.8E-05 | 3.6E-05 |
| 3417824 | 24.4 | male   | 53 | p.Ile251TrpfsTer34 | frameshift_variant | 3.5E-05 | .    | .    | .       | 2.8E-05 | 3.6E-05 |
| 3684198 | 32.5 | male   | 52 | p.Ile251TrpfsTer34 | frameshift_variant | 3.5E-05 | .    | .    | .       | 2.8E-05 | 3.6E-05 |
| 4356368 | 26.8 | male   | 65 | p.Ile251TrpfsTer34 | frameshift_variant | 3.5E-05 | .    | .    | .       | 2.8E-05 | 3.6E-05 |
| 4761722 | 26.5 | male   | 56 | p.Ile251TrpfsTer34 | frameshift_variant | 3.5E-05 | .    | .    | .       | 2.8E-05 | 3.6E-05 |
| 5499707 | NA   | NA     | NA | p.Ile251TrpfsTer34 | frameshift_variant | 3.5E-05 | .    | .    | .       | 2.8E-05 | 3.6E-05 |
| 1014534 | 30.9 | female | 67 | p.Gly252Ser        | missense_variant   | 1.4E-04 | 25.9 | 0.82 | 5.6E-05 | 7.7E-05 | 4.0E-05 |
| 1068328 | 28.8 | female | 67 | p.Gly252Ser        | missense_variant   | 1.4E-04 | 25.9 | 0.82 | 5.6E-05 | 7.7E-05 | 4.0E-05 |
| 1078482 | 31.6 | male   | 57 | p.Gly252Ser        | missense_variant   | 1.4E-04 | 25.9 | 0.82 | 5.6E-05 | 7.7E-05 | 4.0E-05 |
| 1187634 | 25.1 | female | 61 | p.Gly252Ser        | missense_variant   | 1.4E-04 | 25.9 | 0.82 | 5.6E-05 | 7.7E-05 | 4.0E-05 |
| 1245951 | 25.4 | male   | 44 | p.Gly252Ser        | missense_variant   | 1.4E-04 | 25.9 | 0.82 | 5.6E-05 | 7.7E-05 | 4.0E-05 |
| 1318994 | 31.9 | male   | 60 | p.Gly252Ser        | missense_variant   | 1.4E-04 | 25.9 | 0.82 | 5.6E-05 | 7.7E-05 | 4.0E-05 |
| 1495579 | 27.4 | male   | 60 | p.Gly252Ser        | missense_variant   | 1.4E-04 | 25.9 | 0.82 | 5.6E-05 | 7.7E-05 | 4.0E-05 |
| 1601568 | 27.0 | male   | 61 | p.Gly252Ser        | missense_variant   | 1.4E-04 | 25.9 | 0.82 | 5.6E-05 | 7.7E-05 | 4.0E-05 |
| 1698228 | 26.3 | male   | 66 | p.Gly252Ser        | missense_variant   | 1.4E-04 | 25.9 | 0.82 | 5.6E-05 | 7.7E-05 | 4.0E-05 |
| 1739448 | 28.1 | male   | 67 | p.Gly252Ser        | missense_variant   | 1.4E-04 | 25.9 | 0.82 | 5.6E-05 | 7.7E-05 | 4.0E-05 |
| 1789865 | 32.0 | female | 63 | p.Gly252Ser        | missense_variant   | 1.4E-04 | 25.9 | 0.82 | 5.6E-05 | 7.7E-05 | 4.0E-05 |
| 1793829 | 27.1 | female | 58 | p.Gly252Ser        | missense_variant   | 1.4E-04 | 25.9 | 0.82 | 5.6E-05 | 7.7E-05 | 4.0E-05 |
| 1861300 | 24.7 | male   | 44 | p.Gly252Ser        | missense_variant   | 1.4E-04 | 25.9 | 0.82 | 5.6E-05 | 7.7E-05 | 4.0E-05 |
| 1947013 | 25.7 | male   | 66 | p.Gly252Ser        | missense_variant   | 1.4E-04 | 25.9 | 0.82 | 5.6E-05 | 7.7E-05 | 4.0E-05 |
| 1983251 | 26.1 | male   | 59 | p.Gly252Ser        | missense_variant   | 1.4E-04 | 25.9 | 0.82 | 5.6E-05 | 7.7E-05 | 4.0E-05 |



|         |      |        |    |             |                  |         |      |      |         |         |         |
|---------|------|--------|----|-------------|------------------|---------|------|------|---------|---------|---------|
| 2251960 | 23.0 | female | 54 | p.Gly252Ser | missense_variant | 1.4E-04 | 25.9 | 0.82 | 5.6E-05 | 7.7E-05 | 4.0E-05 |
| 2256366 | 24.5 | NA     | 65 | p.Gly252Ser | missense_variant | 1.4E-04 | 25.9 | 0.82 | 5.6E-05 | 7.7E-05 | 4.0E-05 |
| 2360113 | 25.7 | male   | 49 | p.Gly252Ser | missense_variant | 1.4E-04 | 25.9 | 0.82 | 5.6E-05 | 7.7E-05 | 4.0E-05 |
| 2397908 | 24.1 | female | 57 | p.Gly252Ser | missense_variant | 1.4E-04 | 25.9 | 0.82 | 5.6E-05 | 7.7E-05 | 4.0E-05 |
| 2572730 | 22.7 | female | 68 | p.Gly252Ser | missense_variant | 1.4E-04 | 25.9 | 0.82 | 5.6E-05 | 7.7E-05 | 4.0E-05 |
| 2744870 | 27.7 | male   | 40 | p.Gly252Ser | missense_variant | 1.4E-04 | 25.9 | 0.82 | 5.6E-05 | 7.7E-05 | 4.0E-05 |
| 2782577 | 25.1 | female | 44 | p.Gly252Ser | missense_variant | 1.4E-04 | 25.9 | 0.82 | 5.6E-05 | 7.7E-05 | 4.0E-05 |
| 2794986 | 24.7 | male   | 70 | p.Gly252Ser | missense_variant | 1.4E-04 | 25.9 | 0.82 | 5.6E-05 | 7.7E-05 | 4.0E-05 |
| 2837654 | 27.6 | female | 45 | p.Gly252Ser | missense_variant | 1.4E-04 | 25.9 | 0.82 | 5.6E-05 | 7.7E-05 | 4.0E-05 |
| 3056478 | 28.0 | female | 68 | p.Gly252Ser | missense_variant | 1.4E-04 | 25.9 | 0.82 | 5.6E-05 | 7.7E-05 | 4.0E-05 |
| 3067457 | 26.1 | male   | 70 | p.Gly252Ser | missense_variant | 1.4E-04 | 25.9 | 0.82 | 5.6E-05 | 7.7E-05 | 4.0E-05 |
| 3100688 | 31.8 | female | 53 | p.Gly252Ser | missense_variant | 1.4E-04 | 25.9 | 0.82 | 5.6E-05 | 7.7E-05 | 4.0E-05 |
| 3182501 | NA   | NA     | NA | p.Gly252Ser | missense_variant | 1.4E-04 | 25.9 | 0.82 | 5.6E-05 | 7.7E-05 | 4.0E-05 |
| 3201757 | 29.0 | male   | 60 | p.Gly252Ser | missense_variant | 1.4E-04 | 25.9 | 0.82 | 5.6E-05 | 7.7E-05 | 4.0E-05 |
| 3206184 | 29.7 | male   | 50 | p.Gly252Ser | missense_variant | 1.4E-04 | 25.9 | 0.82 | 5.6E-05 | 7.7E-05 | 4.0E-05 |
| 3893594 | 28.6 | male   | 70 | p.Gly252Ser | missense_variant | 1.4E-04 | 25.9 | 0.82 | 5.6E-05 | 7.7E-05 | 4.0E-05 |
| 4081183 | 30.1 | male   | 57 | p.Gly252Ser | missense_variant | 1.4E-04 | 25.9 | 0.82 | 5.6E-05 | 7.7E-05 | 4.0E-05 |
| 4084977 | 23.0 | female | 66 | p.Gly252Ser | missense_variant | 1.4E-04 | 25.9 | 0.82 | 5.6E-05 | 7.7E-05 | 4.0E-05 |
| 4166149 | 23.2 | female | 69 | p.Gly252Ser | missense_variant | 1.4E-04 | 25.9 | 0.82 | 5.6E-05 | 7.7E-05 | 4.0E-05 |
| 4248852 | 24.3 | female | 64 | p.Gly252Ser | missense_variant | 1.4E-04 | 25.9 | 0.82 | 5.6E-05 | 7.7E-05 | 4.0E-05 |
| 4257062 | 25.6 | female | 66 | p.Gly252Ser | missense_variant | 1.4E-04 | 25.9 | 0.82 | 5.6E-05 | 7.7E-05 | 4.0E-05 |
| 4417370 | 21.1 | male   | 64 | p.Gly252Ser | missense_variant | 1.4E-04 | 25.9 | 0.82 | 5.6E-05 | 7.7E-05 | 4.0E-05 |
| 4434801 | 27.9 | female | 63 | p.Gly252Ser | missense_variant | 1.4E-04 | 25.9 | 0.82 | 5.6E-05 | 7.7E-05 | 4.0E-05 |
| 4437155 | 30.0 | female | 46 | p.Gly252Ser | missense_variant | 1.4E-04 | 25.9 | 0.82 | 5.6E-05 | 7.7E-05 | 4.0E-05 |
| 4447228 | 31.8 | male   | 41 | p.Gly252Ser | missense_variant | 1.4E-04 | 25.9 | 0.82 | 5.6E-05 | 7.7E-05 | 4.0E-05 |
| 4513677 | 30.4 | male   | 62 | p.Gly252Ser | missense_variant | 1.4E-04 | 25.9 | 0.82 | 5.6E-05 | 7.7E-05 | 4.0E-05 |
| 4541212 | 28.3 | female | 60 | p.Gly252Ser | missense_variant | 1.4E-04 | 25.9 | 0.82 | 5.6E-05 | 7.7E-05 | 4.0E-05 |
| 4548603 | 32.0 | male   | 61 | p.Gly252Ser | missense_variant | 1.4E-04 | 25.9 | 0.82 | 5.6E-05 | 7.7E-05 | 4.0E-05 |

|         |      |        |    |             |                  |         |      |      |         |         |         |
|---------|------|--------|----|-------------|------------------|---------|------|------|---------|---------|---------|
| 4783476 | 23.2 | male   | 67 | p.Gly252Ser | missense_variant | 1.4E-04 | 25.9 | 0.82 | 5.6E-05 | 7.7E-05 | 4.0E-05 |
| 4989575 | 25.8 | female | 50 | p.Gly252Ser | missense_variant | 1.4E-04 | 25.9 | 0.82 | 5.6E-05 | 7.7E-05 | 4.0E-05 |
| 5161598 | 25.5 | female | 59 | p.Gly252Ser | missense_variant | 1.4E-04 | 25.9 | 0.82 | 5.6E-05 | 7.7E-05 | 4.0E-05 |
| 5403740 | 31.2 | female | 63 | p.Gly252Ser | missense_variant | 1.4E-04 | 25.9 | 0.82 | 5.6E-05 | 7.7E-05 | 4.0E-05 |
| 5446395 | 23.7 | female | 42 | p.Gly252Ser | missense_variant | 1.4E-04 | 25.9 | 0.82 | 5.6E-05 | 7.7E-05 | 4.0E-05 |
| 5543588 | 25.4 | male   | 68 | p.Gly252Ser | missense_variant | 1.4E-04 | 25.9 | 0.82 | 5.6E-05 | 7.7E-05 | 4.0E-05 |
| 5619796 | 26.9 | male   | 64 | p.Gly252Ser | missense_variant | 1.4E-04 | 25.9 | 0.82 | 5.6E-05 | 7.7E-05 | 4.0E-05 |
| 5678136 | 27.3 | male   | 64 | p.Gly252Ser | missense_variant | 1.4E-04 | 25.9 | 0.82 | 5.6E-05 | 7.7E-05 | 4.0E-05 |
| 5724023 | 25.9 | male   | 46 | p.Gly252Ser | missense_variant | 1.4E-04 | 25.9 | 0.82 | 5.6E-05 | 7.7E-05 | 4.0E-05 |
| 5797153 | 23.9 | female | 46 | p.Gly252Ser | missense_variant | 1.4E-04 | 25.9 | 0.82 | 5.6E-05 | 7.7E-05 | 4.0E-05 |
| 5877990 | 30.7 | female | 59 | p.Gly252Ser | missense_variant | 1.4E-04 | 25.9 | 0.82 | 5.6E-05 | 7.7E-05 | 4.0E-05 |
| 5975002 | 20.8 | female | 42 | p.Gly252Ser | missense_variant | 1.4E-04 | 25.9 | 0.82 | 5.6E-05 | 7.7E-05 | 4.0E-05 |
| 1226066 | NA   | NA     | NA | p.Trp258Ter | stop_gained      | 7.5E-06 | 41   | .    | .       | .       | .       |
| 1353264 | 33.8 | male   | 62 | p.Trp258Ter | stop_gained      | 7.5E-06 | 41   | .    | .       | .       | .       |
| 2107110 | 42.2 | male   | 62 | p.Trp258Ter | stop_gained      | 7.5E-06 | 41   | .    | .       | .       | .       |
| 1318429 | 27.4 | male   | 59 | p.Cys271Tyr | missense_variant | 3.0E-05 | 25.7 | 0.84 | .       | .       | .       |
| 1573883 | 19.1 | male   | 55 | p.Cys271Tyr | missense_variant | 3.0E-05 | 25.7 | 0.84 | .       | .       | .       |
| 1651427 | 28.5 | female | 66 | p.Cys271Tyr | missense_variant | 3.0E-05 | 25.7 | 0.84 | .       | .       | .       |
| 2584334 | 32.6 | male   | 66 | p.Cys271Tyr | missense_variant | 3.0E-05 | 25.7 | 0.84 | .       | .       | .       |
| 2932881 | 28.0 | male   | 46 | p.Cys271Tyr | missense_variant | 3.0E-05 | 25.7 | 0.84 | .       | .       | .       |
| 3311591 | NA   | NA     | NA | p.Cys271Tyr | missense_variant | 3.0E-05 | 25.7 | 0.84 | .       | .       | .       |
| 3854947 | 40.3 | female | 63 | p.Cys271Tyr | missense_variant | 3.0E-05 | 25.7 | 0.84 | .       | .       | .       |
| 4311208 | 28.6 | male   | 65 | p.Cys271Tyr | missense_variant | 3.0E-05 | 25.7 | 0.84 | .       | .       | .       |
| 4660457 | 24.5 | male   | 44 | p.Cys271Tyr | missense_variant | 3.0E-05 | 25.7 | 0.84 | .       | .       | .       |
| 5123898 | 35.6 | female | 59 | p.Cys271Tyr | missense_variant | 3.0E-05 | 25.7 | 0.84 | .       | .       | .       |
| 5160780 | 25.9 | female | 67 | p.Cys271Tyr | missense_variant | 3.0E-05 | 25.7 | 0.84 | .       | .       | .       |
| 5597794 | 40.3 | male   | 47 | p.Cys271Tyr | missense_variant | 3.0E-05 | 25.7 | 0.84 | .       | .       | .       |
| 1485299 | NA   | NA     | NA | p.Cys271Arg | missense_variant | 2.5E-06 | 29.7 | 0.84 | .       | .       | 4.0E-06 |

|         |      |        |    |                    |                    |         |      |      |         |         |         |
|---------|------|--------|----|--------------------|--------------------|---------|------|------|---------|---------|---------|
| 2248353 | 23.0 | male   | 51 | p.Asn274Ser        | missense_variant   | 2.5E-06 | 24.3 | 0.56 | 8.0E-06 | 7.0E-06 | 8.0E-06 |
| 3004434 | 28.0 | male   | 43 | p.Pro275Ser        | missense_variant   | 5.0E-06 | 25.4 | 0.69 | .       | 7.0E-06 | 2.4E-05 |
| 4538110 | 29.6 | female | 42 | p.Pro275Ser        | missense_variant   | 5.0E-06 | 25.4 | 0.69 | .       | 7.0E-06 | 2.4E-05 |
| 1547103 | 33.1 | male   | 49 | p.Tyr276Ter        | stop_gained        | 5.0E-06 | .    | .    | 8.0E-06 | 7.0E-06 | .       |
| 5411740 | 26.9 | male   | 42 | p.Tyr276Ter        | stop_gained        | 5.0E-06 | .    | .    | 8.0E-06 | 7.0E-06 | .       |
| 1129052 | 35.5 | male   | 45 | p.Phe280AlafsTer12 | frameshift_variant | 2.5E-05 | .    | .    | 1.6E-05 | .       | 4.0E-06 |
| 1374843 | 26.3 | male   | 65 | p.Phe280AlafsTer12 | frameshift_variant | 2.5E-05 | .    | .    | 1.6E-05 | .       | 4.0E-06 |
| 1422118 | 29.2 | male   | 60 | p.Phe280AlafsTer12 | frameshift_variant | 2.5E-05 | .    | .    | 1.6E-05 | .       | 4.0E-06 |
| 1848479 | 28.6 | female | 45 | p.Phe280AlafsTer12 | frameshift_variant | 2.5E-05 | .    | .    | 1.6E-05 | .       | 4.0E-06 |
| 3423651 | NA   | NA     | NA | p.Phe280AlafsTer12 | frameshift_variant | 2.5E-05 | .    | .    | 1.6E-05 | .       | 4.0E-06 |
| 3590658 | 25.2 | male   | 64 | p.Phe280AlafsTer12 | frameshift_variant | 2.5E-05 | .    | .    | 1.6E-05 | .       | 4.0E-06 |
| 3788842 | 30.7 | female | 66 | p.Phe280AlafsTer12 | frameshift_variant | 2.5E-05 | .    | .    | 1.6E-05 | .       | 4.0E-06 |
| 4747364 | 28.9 | female | 62 | p.Phe280AlafsTer12 | frameshift_variant | 2.5E-05 | .    | .    | 1.6E-05 | .       | 4.0E-06 |
| 4877811 | 27.3 | female | 54 | p.Phe280AlafsTer12 | frameshift_variant | 2.5E-05 | .    | .    | 1.6E-05 | .       | 4.0E-06 |
| 5298846 | 26.4 | male   | 51 | p.Phe280AlafsTer12 | frameshift_variant | 2.5E-05 | .    | .    | 1.6E-05 | .       | 4.0E-06 |
| 4336507 | 23.8 | female | 50 | p.Phe284Cys        | missense_variant   | 7.5E-06 | 32   | 0.77 | .       | .       | 4.0E-06 |
| 4761238 | 28.5 | male   | 42 | p.Phe284Cys        | missense_variant   | 7.5E-06 | 32   | 0.77 | .       | .       | 4.0E-06 |
| 5490331 | 23.1 | male   | 65 | p.Phe284Cys        | missense_variant   | 7.5E-06 | 32   | 0.77 | .       | .       | 4.0E-06 |
| 2805541 | 39.1 | female | 57 | p.Phe284Ile        | missense_variant   | 2.5E-06 | 32   | 0.76 | .       | .       | .       |
| 3129619 | NA   | NA     | NA | p.Met292SerfsTer9  | frameshift_variant | 2.5E-06 | .    | .    | .       | .       | 8.0E-06 |
| 1117178 | 28.0 | male   | 63 | p.Ser295Pro        | missense_variant   | 1.5E-05 | 28   | 0.84 | 2.4E-05 | 1.4E-05 | 1.2E-05 |
| 1280931 | 30.4 | female | 59 | p.Ser295Pro        | missense_variant   | 1.5E-05 | 28   | 0.84 | 2.4E-05 | 1.4E-05 | 1.2E-05 |
| 3628269 | 26.3 | female | 49 | p.Ser295Pro        | missense_variant   | 1.5E-05 | 28   | 0.84 | 2.4E-05 | 1.4E-05 | 1.2E-05 |
| 5412957 | 22.9 | female | 51 | p.Ser295Pro        | missense_variant   | 1.5E-05 | 28   | 0.84 | 2.4E-05 | 1.4E-05 | 1.2E-05 |
| 5846023 | 25.2 | male   | 48 | p.Ser295Pro        | missense_variant   | 1.5E-05 | 28   | 0.84 | 2.4E-05 | 1.4E-05 | 1.2E-05 |
| 5995066 | 19.9 | female | 68 | p.Ser295Pro        | missense_variant   | 1.5E-05 | 28   | 0.84 | 2.4E-05 | 1.4E-05 | 1.2E-05 |
| 1170669 | 31.5 | male   | 59 | p.Ser295Ter        | stop_gained        | 1.5E-05 | 47   | .    | .       | .       | .       |
| 4418202 | 31.7 | male   | 51 | p.Ser295Ter        | stop_gained        | 1.5E-05 | 47   | .    | .       | .       | .       |

|         |      |        |    |             |                  |         |      |      |         |         |         |
|---------|------|--------|----|-------------|------------------|---------|------|------|---------|---------|---------|
| 4776228 | 28.5 | male   | 50 | p.Ser295Ter | stop_gained      | 1.5E-05 | 47   | .    | .       | .       | .       |
| 4782939 | 27.6 | male   | 57 | p.Ser295Ter | stop_gained      | 1.5E-05 | 47   | .    | .       | .       | .       |
| 5260783 | 32.1 | female | 63 | p.Ser295Ter | stop_gained      | 1.5E-05 | 47   | .    | .       | .       | .       |
| 5781140 | 27.3 | male   | 63 | p.Ser295Ter | stop_gained      | 1.5E-05 | 47   | .    | .       | .       | .       |
| 5165152 | 23.7 | male   | 47 | p.Ser295Leu | missense_variant | 2.5E-06 | 34   | 0.71 | .       | .       | .       |
| 2766605 | 42.5 | female | 56 | p.Pro299His | missense_variant | 1.5E-05 | 29.7 | 0.95 | 4.0E-05 | 4.2E-05 | 8.0E-06 |
| 3908180 | 33.6 | male   | 66 | p.Pro299His | missense_variant | 1.5E-05 | 29.7 | 0.95 | 4.0E-05 | 4.2E-05 | 8.0E-06 |
| 4114299 | 33.2 | female | 64 | p.Pro299His | missense_variant | 1.5E-05 | 29.7 | 0.95 | 4.0E-05 | 4.2E-05 | 8.0E-06 |
| 4457674 | 32.4 | male   | 63 | p.Pro299His | missense_variant | 1.5E-05 | 29.7 | 0.95 | 4.0E-05 | 4.2E-05 | 8.0E-06 |
| 4632201 | 24.5 | female | 57 | p.Pro299His | missense_variant | 1.5E-05 | 29.7 | 0.95 | 4.0E-05 | 4.2E-05 | 8.0E-06 |
| 5282683 | 30.7 | female | 65 | p.Pro299His | missense_variant | 1.5E-05 | 29.7 | 0.95 | 4.0E-05 | 4.2E-05 | 8.0E-06 |
| 2097896 | NA   | NA     | NA | p.Tyr302Phe | missense_variant | 5.0E-06 | 27.4 | 0.90 | .       | .       | 8.0E-06 |
| 5204419 | 26.4 | male   | 65 | p.Tyr302Phe | missense_variant | 5.0E-06 | 27.4 | 0.90 | .       | .       | 8.0E-06 |
| 1824409 | 26.7 | male   | 63 | p.Arg305Gln | missense_variant | 1.7E-05 | 32   | 0.54 | 3.2E-05 | 2.8E-05 | 3.6E-05 |
| 2940832 | 27.1 | male   | 55 | p.Arg305Gln | missense_variant | 1.7E-05 | 32   | 0.54 | 3.2E-05 | 2.8E-05 | 3.6E-05 |
| 4273905 | 34.5 | male   | 46 | p.Arg305Gln | missense_variant | 1.7E-05 | 32   | 0.54 | 3.2E-05 | 2.8E-05 | 3.6E-05 |
| 4688918 | 20.8 | male   | 56 | p.Arg305Gln | missense_variant | 1.7E-05 | 32   | 0.54 | 3.2E-05 | 2.8E-05 | 3.6E-05 |
| 4807525 | 49.0 | female | 60 | p.Arg305Gln | missense_variant | 1.7E-05 | 32   | 0.54 | 3.2E-05 | 2.8E-05 | 3.6E-05 |
| 4924291 | 26.0 | male   | 61 | p.Arg305Gln | missense_variant | 1.7E-05 | 32   | 0.54 | 3.2E-05 | 2.8E-05 | 3.6E-05 |
| 5085759 | NA   | NA     | NA | p.Arg305Gln | missense_variant | 1.7E-05 | 32   | 0.54 | 3.2E-05 | 2.8E-05 | 3.6E-05 |
| 1207444 | 39.9 | male   | 68 | p.Arg305Trp | missense_variant | 1.0E-05 | 27   | 0.39 | 4.0E-05 | 4.9E-05 | 2.8E-05 |
| 3183654 | 28.0 | male   | 41 | p.Arg305Trp | missense_variant | 1.0E-05 | 27   | 0.39 | 4.0E-05 | 4.9E-05 | 2.8E-05 |
| 4753652 | 31.1 | female | 45 | p.Arg305Trp | missense_variant | 1.0E-05 | 27   | 0.39 | 4.0E-05 | 4.9E-05 | 2.8E-05 |
| 5158480 | 21.6 | female | 59 | p.Arg305Trp | missense_variant | 1.0E-05 | 27   | 0.39 | 4.0E-05 | 4.9E-05 | 2.8E-05 |
| 1159403 | 26.8 | male   | 44 | p.Ser306Asn | missense_variant | 5.0E-05 | 25.4 | 0.43 | 3.2E-05 | 2.1E-05 | 8.0E-06 |
| 1215998 | 39.1 | female | 61 | p.Ser306Asn | missense_variant | 5.0E-05 | 25.4 | 0.43 | 3.2E-05 | 2.1E-05 | 8.0E-06 |
| 1228107 | 26.3 | male   | 67 | p.Ser306Asn | missense_variant | 5.0E-05 | 25.4 | 0.43 | 3.2E-05 | 2.1E-05 | 8.0E-06 |
| 1396128 | 19.6 | female | 51 | p.Ser306Asn | missense_variant | 5.0E-05 | 25.4 | 0.43 | 3.2E-05 | 2.1E-05 | 8.0E-06 |

|         |      |        |    |                    |                    |         |      |      |         |         |         |
|---------|------|--------|----|--------------------|--------------------|---------|------|------|---------|---------|---------|
| 1448695 | NA   | female | 69 | p.Ser306Asn        | missense_variant   | 5.0E-05 | 25.4 | 0.43 | 3.2E-05 | 2.1E-05 | 8.0E-06 |
| 1617038 | 42.7 | female | 54 | p.Ser306Asn        | missense_variant   | 5.0E-05 | 25.4 | 0.43 | 3.2E-05 | 2.1E-05 | 8.0E-06 |
| 1810409 | NA   | NA     | NA | p.Ser306Asn        | missense_variant   | 5.0E-05 | 25.4 | 0.43 | 3.2E-05 | 2.1E-05 | 8.0E-06 |
| 2097483 | 55.1 | female | 50 | p.Ser306Asn        | missense_variant   | 5.0E-05 | 25.4 | 0.43 | 3.2E-05 | 2.1E-05 | 8.0E-06 |
| 2221009 | NA   | NA     | NA | p.Ser306Asn        | missense_variant   | 5.0E-05 | 25.4 | 0.43 | 3.2E-05 | 2.1E-05 | 8.0E-06 |
| 3261670 | 27.8 | male   | 59 | p.Ser306Asn        | missense_variant   | 5.0E-05 | 25.4 | 0.43 | 3.2E-05 | 2.1E-05 | 8.0E-06 |
| 3642712 | 33.2 | female | 67 | p.Ser306Asn        | missense_variant   | 5.0E-05 | 25.4 | 0.43 | 3.2E-05 | 2.1E-05 | 8.0E-06 |
| 3700568 | 30.4 | male   | 53 | p.Ser306Asn        | missense_variant   | 5.0E-05 | 25.4 | 0.43 | 3.2E-05 | 2.1E-05 | 8.0E-06 |
| 3799480 | 21.0 | male   | 62 | p.Ser306Asn        | missense_variant   | 5.0E-05 | 25.4 | 0.43 | 3.2E-05 | 2.1E-05 | 8.0E-06 |
| 4346533 | NA   | NA     | NA | p.Ser306Asn        | missense_variant   | 5.0E-05 | 25.4 | 0.43 | 3.2E-05 | 2.1E-05 | 8.0E-06 |
| 4381306 | 23.5 | male   | 52 | p.Ser306Asn        | missense_variant   | 5.0E-05 | 25.4 | 0.43 | 3.2E-05 | 2.1E-05 | 8.0E-06 |
| 4391842 | 33.8 | female | 51 | p.Ser306Asn        | missense_variant   | 5.0E-05 | 25.4 | 0.43 | 3.2E-05 | 2.1E-05 | 8.0E-06 |
| 4539042 | 23.3 | female | 65 | p.Ser306Asn        | missense_variant   | 5.0E-05 | 25.4 | 0.43 | 3.2E-05 | 2.1E-05 | 8.0E-06 |
| 4647624 | 37.1 | male   | 51 | p.Ser306Asn        | missense_variant   | 5.0E-05 | 25.4 | 0.43 | 3.2E-05 | 2.1E-05 | 8.0E-06 |
| 5352640 | 19.2 | female | 56 | p.Ser306Asn        | missense_variant   | 5.0E-05 | 25.4 | 0.43 | 3.2E-05 | 2.1E-05 | 8.0E-06 |
| 5854292 | 29.5 | female | 60 | p.Ser306Asn        | missense_variant   | 5.0E-05 | 25.4 | 0.43 | 3.2E-05 | 2.1E-05 | 8.0E-06 |
| 2820203 | 32.1 | male   | 61 | p.Gln307Ter        | stop_gained        | 2.5E-06 | 46   | .    | 8.0E-06 | 7.0E-06 | 8.0E-06 |
| 1018788 | 30.1 | female | 64 | p.Glu308Lys        | missense_variant   | 1.5E-05 | 29.4 | 0.64 | 8.0E-06 | 1.4E-05 | 8.0E-06 |
| 1692166 | 31.3 | male   | 66 | p.Glu308Lys        | missense_variant   | 1.5E-05 | 29.4 | 0.64 | 8.0E-06 | 1.4E-05 | 8.0E-06 |
| 2057577 | 24.2 | female | 61 | p.Glu308Lys        | missense_variant   | 1.5E-05 | 29.4 | 0.64 | 8.0E-06 | 1.4E-05 | 8.0E-06 |
| 2218291 | 21.9 | female | 59 | p.Glu308Lys        | missense_variant   | 1.5E-05 | 29.4 | 0.64 | 8.0E-06 | 1.4E-05 | 8.0E-06 |
| 4499023 | 31.0 | female | 63 | p.Glu308Lys        | missense_variant   | 1.5E-05 | 29.4 | 0.64 | 8.0E-06 | 1.4E-05 | 8.0E-06 |
| 4706163 | 26.1 | male   | 45 | p.Glu308Lys        | missense_variant   | 1.5E-05 | 29.4 | 0.64 | 8.0E-06 | 1.4E-05 | 8.0E-06 |
| 2622690 | 31.6 | female | 54 | p.Glu308Val        | missense_variant   | 2.5E-06 | 29.5 | 0.77 | 5.6E-05 | 3.5E-05 | 8.0E-06 |
| 3471612 | 26.7 | male   | 57 | p.Ile316Ser        | missense_variant   | 7.5E-06 | 34   | 0.67 | .       | 1.4E-05 | 2.0E-05 |
| 5110819 | 33.8 | female | 60 | p.Ile316Ser        | missense_variant   | 7.5E-06 | 34   | 0.67 | .       | 1.4E-05 | 2.0E-05 |
| 5624110 | 27.5 | female | 66 | p.Ile316Ser        | missense_variant   | 7.5E-06 | 34   | 0.67 | .       | 1.4E-05 | 2.0E-05 |
| 4713760 | 43.1 | female | 53 | p.Leu322TrpfsTer33 | frameshift_variant | 2.5E-06 | .    | .    | .       | .       | .       |

|         |      |        |    |             |                  |         |      |      |         |         |         |
|---------|------|--------|----|-------------|------------------|---------|------|------|---------|---------|---------|
| 2014144 | 41.4 | female | 65 | p.Leu325Phe | missense_variant | 2.5E-06 | 15.6 | 0.39 | .       | .       | .       |
| 2207685 | 29.6 | male   | 70 | p.Tyr332Cys | missense_variant | 1.7E-05 | 26.8 | 0.36 | 2.4E-05 | 2.8E-05 | .       |
| 2488699 | 21.7 | female | 65 | p.Tyr332Cys | missense_variant | 1.7E-05 | 26.8 | 0.36 | 2.4E-05 | 2.8E-05 | .       |
| 3593904 | 26.0 | male   | 54 | p.Tyr332Cys | missense_variant | 1.7E-05 | 26.8 | 0.36 | 2.4E-05 | 2.8E-05 | .       |
| 4392500 | 30.3 | male   | 60 | p.Tyr332Cys | missense_variant | 1.7E-05 | 26.8 | 0.36 | 2.4E-05 | 2.8E-05 | .       |
| 4848184 | 20.9 | female | 54 | p.Tyr332Cys | missense_variant | 1.7E-05 | 26.8 | 0.36 | 2.4E-05 | 2.8E-05 | .       |
| 5303549 | 26.2 | male   | 42 | p.Tyr332Cys | missense_variant | 1.7E-05 | 26.8 | 0.36 | 2.4E-05 | 2.8E-05 | .       |
| 5912744 | 25.4 | female | 59 | p.Tyr332Cys | missense_variant | 1.7E-05 | 26.8 | 0.36 | 2.4E-05 | 2.8E-05 | .       |
| 1233912 | 27.2 | male   | 50 | p.Tyr332His | missense_variant | 7.5E-06 | 24.7 | 0.38 | 1.6E-05 | 7.0E-06 | 8.0E-06 |
| 2539121 | 24.8 | female | 46 | p.Tyr332His | missense_variant | 7.5E-06 | 24.7 | 0.38 | 1.6E-05 | 7.0E-06 | 8.0E-06 |
| 4633126 | 22.9 | female | 58 | p.Tyr332His | missense_variant | 7.5E-06 | 24.7 | 0.38 | 1.6E-05 | 7.0E-06 | 8.0E-06 |
| 1092752 | 36.4 | female | 55 | p.Arg18Leu  | missense_variant | 3.5E-05 | 20.7 | 0.31 | 4.0E-05 | 4.2E-05 | 1.2E-05 |
| 1117247 | 36.4 | male   | 50 | p.Arg18Leu  | missense_variant | 3.5E-05 | 20.7 | 0.31 | 4.0E-05 | 4.2E-05 | 1.2E-05 |
| 1383182 | 29.1 | female | 41 | p.Arg18Leu  | missense_variant | 3.5E-05 | 20.7 | 0.31 | 4.0E-05 | 4.2E-05 | 1.2E-05 |
| 1727279 | 28.0 | female | 45 | p.Arg18Leu  | missense_variant | 3.5E-05 | 20.7 | 0.31 | 4.0E-05 | 4.2E-05 | 1.2E-05 |
| 1804807 | 26.2 | male   | 49 | p.Arg18Leu  | missense_variant | 3.5E-05 | 20.7 | 0.31 | 4.0E-05 | 4.2E-05 | 1.2E-05 |
| 1814496 | 24.8 | female | 54 | p.Arg18Leu  | missense_variant | 3.5E-05 | 20.7 | 0.31 | 4.0E-05 | 4.2E-05 | 1.2E-05 |
| 2254745 | 25.3 | female | 55 | p.Arg18Leu  | missense_variant | 3.5E-05 | 20.7 | 0.31 | 4.0E-05 | 4.2E-05 | 1.2E-05 |
| 3840021 | 34.7 | male   | 49 | p.Arg18Leu  | missense_variant | 3.5E-05 | 20.7 | 0.31 | 4.0E-05 | 4.2E-05 | 1.2E-05 |
| 4057465 | 30.0 | male   | 50 | p.Arg18Leu  | missense_variant | 3.5E-05 | 20.7 | 0.31 | 4.0E-05 | 4.2E-05 | 1.2E-05 |
| 4269020 | 25.6 | male   | 62 | p.Arg18Leu  | missense_variant | 3.5E-05 | 20.7 | 0.31 | 4.0E-05 | 4.2E-05 | 1.2E-05 |
| 4276981 | 26.6 | male   | 49 | p.Arg18Leu  | missense_variant | 3.5E-05 | 20.7 | 0.31 | 4.0E-05 | 4.2E-05 | 1.2E-05 |
| 4924573 | 28.4 | male   | 67 | p.Arg18Leu  | missense_variant | 3.5E-05 | 20.7 | 0.31 | 4.0E-05 | 4.2E-05 | 1.2E-05 |
| 5602800 | 24.5 | NA     | 43 | p.Arg18Leu  | missense_variant | 3.5E-05 | 20.7 | 0.31 | 4.0E-05 | 4.2E-05 | 1.2E-05 |
| 5633683 | 34.1 | female | 56 | p.Arg18Leu  | missense_variant | 3.5E-05 | 20.7 | 0.31 | 4.0E-05 | 4.2E-05 | 1.2E-05 |
| 3122152 | 29.1 | male   | 52 | p.Ile63Thr  | missense_variant | 2.5E-06 | 26.4 | 0.28 | .       | .       | .       |
| 2657185 | 22.8 | female | 59 | p.Lys73Asn  | missense_variant | 2.5E-06 | 26   | 0.28 | .       | .       | .       |
| 4440479 | 30.5 | female | 62 | p.Ala89Ser  | missense_variant | 2.5E-06 | 23.5 | 0.33 | .       | .       | .       |

|         |      |        |    |             |                  |         |      |      |         |         |         |
|---------|------|--------|----|-------------|------------------|---------|------|------|---------|---------|---------|
| 4526715 | 36.8 | female | 52 | p.Thr203Ile | missense_variant | 2.5E-06 | 23.6 | 0.27 | .       | .       | .       |
| 1443337 | 28.1 | female | 50 | p.Ala227Thr | missense_variant | 1.3E-05 | 24.1 | 0.26 | 8.0E-06 | 7.0E-06 | 8.0E-06 |
| 2803033 | 24.1 | female | 52 | p.Ala227Thr | missense_variant | 1.3E-05 | 24.1 | 0.26 | 8.0E-06 | 7.0E-06 | 8.0E-06 |
| 4278945 | 25.6 | female | 58 | p.Ala227Thr | missense_variant | 1.3E-05 | 24.1 | 0.26 | 8.0E-06 | 7.0E-06 | 8.0E-06 |
| 5198492 | 29.8 | female | 48 | p.Ala227Thr | missense_variant | 1.3E-05 | 24.1 | 0.26 | 8.0E-06 | 7.0E-06 | 8.0E-06 |
| 5606745 | 25.4 | female | 61 | p.Ala227Thr | missense_variant | 1.3E-05 | 24.1 | 0.26 | 8.0E-06 | 7.0E-06 | 8.0E-06 |
| 1056788 | NA   | NA     | NA | p.Gly231Ser | missense_variant | 1.0E-05 | 22.3 | 0.25 | 3.2E-05 | 2.8E-05 | 6.0E-05 |
| 1389940 | 30.1 | male   | 50 | p.Gly231Ser | missense_variant | 1.0E-05 | 22.3 | 0.25 | 3.2E-05 | 2.8E-05 | 6.0E-05 |
| 2626774 | 28.9 | female | 58 | p.Gly231Ser | missense_variant | 1.0E-05 | 22.3 | 0.25 | 3.2E-05 | 2.8E-05 | 6.0E-05 |
| 5817246 | 26.8 | male   | 49 | p.Gly231Ser | missense_variant | 1.0E-05 | 22.3 | 0.25 | 3.2E-05 | 2.8E-05 | 6.0E-05 |
| 1231130 | 25.6 | female | 67 | p.Arg236Cys | missense_variant | 9.7E-05 | 25   | 0.29 | 4.8E-05 | 4.9E-05 | 7.2E-05 |
| 1358347 | 28.5 | female | 65 | p.Arg236Cys | missense_variant | 9.7E-05 | 25   | 0.29 | 4.8E-05 | 4.9E-05 | 7.2E-05 |
| 1658266 | 23.7 | female | 55 | p.Arg236Cys | missense_variant | 9.7E-05 | 25   | 0.29 | 4.8E-05 | 4.9E-05 | 7.2E-05 |
| 1895633 | 28.6 | female | 60 | p.Arg236Cys | missense_variant | 9.7E-05 | 25   | 0.29 | 4.8E-05 | 4.9E-05 | 7.2E-05 |
| 1897443 | 29.0 | male   | 49 | p.Arg236Cys | missense_variant | 9.7E-05 | 25   | 0.29 | 4.8E-05 | 4.9E-05 | 7.2E-05 |
| 2001523 | 23.4 | female | 53 | p.Arg236Cys | missense_variant | 9.7E-05 | 25   | 0.29 | 4.8E-05 | 4.9E-05 | 7.2E-05 |
| 2019732 | NA   | NA     | NA | p.Arg236Cys | missense_variant | 9.7E-05 | 25   | 0.29 | 4.8E-05 | 4.9E-05 | 7.2E-05 |
| 2123437 | 31.8 | female | 48 | p.Arg236Cys | missense_variant | 9.7E-05 | 25   | 0.29 | 4.8E-05 | 4.9E-05 | 7.2E-05 |
| 2265984 | 24.6 | male   | 59 | p.Arg236Cys | missense_variant | 9.7E-05 | 25   | 0.29 | 4.8E-05 | 4.9E-05 | 7.2E-05 |
| 2344149 | 25.7 | male   | 58 | p.Arg236Cys | missense_variant | 9.7E-05 | 25   | 0.29 | 4.8E-05 | 4.9E-05 | 7.2E-05 |
| 2377099 | 33.8 | female | 66 | p.Arg236Cys | missense_variant | 9.7E-05 | 25   | 0.29 | 4.8E-05 | 4.9E-05 | 7.2E-05 |
| 2378871 | 22.9 | male   | 51 | p.Arg236Cys | missense_variant | 9.7E-05 | 25   | 0.29 | 4.8E-05 | 4.9E-05 | 7.2E-05 |
| 2691597 | 22.4 | male   | 62 | p.Arg236Cys | missense_variant | 9.7E-05 | 25   | 0.29 | 4.8E-05 | 4.9E-05 | 7.2E-05 |
| 2747825 | 22.8 | male   | 64 | p.Arg236Cys | missense_variant | 9.7E-05 | 25   | 0.29 | 4.8E-05 | 4.9E-05 | 7.2E-05 |
| 2959889 | 25.5 | male   | 52 | p.Arg236Cys | missense_variant | 9.7E-05 | 25   | 0.29 | 4.8E-05 | 4.9E-05 | 7.2E-05 |
| 3166667 | 26.8 | female | 61 | p.Arg236Cys | missense_variant | 9.7E-05 | 25   | 0.29 | 4.8E-05 | 4.9E-05 | 7.2E-05 |
| 3365275 | 26.5 | male   | 63 | p.Arg236Cys | missense_variant | 9.7E-05 | 25   | 0.29 | 4.8E-05 | 4.9E-05 | 7.2E-05 |
| 3426635 | 22.9 | female | 51 | p.Arg236Cys | missense_variant | 9.7E-05 | 25   | 0.29 | 4.8E-05 | 4.9E-05 | 7.2E-05 |

|         |      |        |    |             |                  |         |      |      |         |         |         |
|---------|------|--------|----|-------------|------------------|---------|------|------|---------|---------|---------|
| 3730837 | 30.9 | female | 41 | p.Arg236Cys | missense_variant | 9.7E-05 | 25   | 0.29 | 4.8E-05 | 4.9E-05 | 7.2E-05 |
| 3783463 | 24.0 | female | 49 | p.Arg236Cys | missense_variant | 9.7E-05 | 25   | 0.29 | 4.8E-05 | 4.9E-05 | 7.2E-05 |
| 3951669 | 24.7 | female | 56 | p.Arg236Cys | missense_variant | 9.7E-05 | 25   | 0.29 | 4.8E-05 | 4.9E-05 | 7.2E-05 |
| 3995742 | 27.5 | female | 57 | p.Arg236Cys | missense_variant | 9.7E-05 | 25   | 0.29 | 4.8E-05 | 4.9E-05 | 7.2E-05 |
| 4057045 | 29.3 | male   | 55 | p.Arg236Cys | missense_variant | 9.7E-05 | 25   | 0.29 | 4.8E-05 | 4.9E-05 | 7.2E-05 |
| 4087507 | 26.0 | female | 58 | p.Arg236Cys | missense_variant | 9.7E-05 | 25   | 0.29 | 4.8E-05 | 4.9E-05 | 7.2E-05 |
| 4287970 | 26.5 | female | 59 | p.Arg236Cys | missense_variant | 9.7E-05 | 25   | 0.29 | 4.8E-05 | 4.9E-05 | 7.2E-05 |
| 4289858 | 19.8 | female | 56 | p.Arg236Cys | missense_variant | 9.7E-05 | 25   | 0.29 | 4.8E-05 | 4.9E-05 | 7.2E-05 |
| 4315127 | 19.7 | female | 65 | p.Arg236Cys | missense_variant | 9.7E-05 | 25   | 0.29 | 4.8E-05 | 4.9E-05 | 7.2E-05 |
| 4358102 | 20.8 | male   | 56 | p.Arg236Cys | missense_variant | 9.7E-05 | 25   | 0.29 | 4.8E-05 | 4.9E-05 | 7.2E-05 |
| 4422258 | 25.2 | female | 54 | p.Arg236Cys | missense_variant | 9.7E-05 | 25   | 0.29 | 4.8E-05 | 4.9E-05 | 7.2E-05 |
| 4508531 | NA   | NA     | NA | p.Arg236Cys | missense_variant | 9.7E-05 | 25   | 0.29 | 4.8E-05 | 4.9E-05 | 7.2E-05 |
| 4984447 | 36.8 | female | 60 | p.Arg236Cys | missense_variant | 9.7E-05 | 25   | 0.29 | 4.8E-05 | 4.9E-05 | 7.2E-05 |
| 5038633 | 27.1 | male   | 45 | p.Arg236Cys | missense_variant | 9.7E-05 | 25   | 0.29 | 4.8E-05 | 4.9E-05 | 7.2E-05 |
| 5073258 | 26.9 | female | 45 | p.Arg236Cys | missense_variant | 9.7E-05 | 25   | 0.29 | 4.8E-05 | 4.9E-05 | 7.2E-05 |
| 5102117 | 35.0 | female | 66 | p.Arg236Cys | missense_variant | 9.7E-05 | 25   | 0.29 | 4.8E-05 | 4.9E-05 | 7.2E-05 |
| 5150940 | 33.3 | female | 61 | p.Arg236Cys | missense_variant | 9.7E-05 | 25   | 0.29 | 4.8E-05 | 4.9E-05 | 7.2E-05 |
| 5326327 | 46.3 | female | 53 | p.Arg236Cys | missense_variant | 9.7E-05 | 25   | 0.29 | 4.8E-05 | 4.9E-05 | 7.2E-05 |
| 5698952 | 29.6 | female | 59 | p.Arg236Cys | missense_variant | 9.7E-05 | 25   | 0.29 | 4.8E-05 | 4.9E-05 | 7.2E-05 |
| 5705636 | 30.5 | female | 61 | p.Arg236Cys | missense_variant | 9.7E-05 | 25   | 0.29 | 4.8E-05 | 4.9E-05 | 7.2E-05 |
| 5978324 | 23.8 | male   | 68 | p.Arg236Cys | missense_variant | 9.7E-05 | 25   | 0.29 | 4.8E-05 | 4.9E-05 | 7.2E-05 |
| 2640076 | 26.0 | male   | 41 | p.Arg236Gly | missense_variant | 2.5E-06 | 26.3 | 0.26 | .       | .       | .       |
| 5792270 | 20.7 | female | 56 | p.Met281Ile | missense_variant | 2.5E-06 | 23.4 | 0.28 | 8.0E-06 | .       | .       |
| 1197045 | 25.2 | female | 64 | p.Gly323Val | missense_variant | 2.5E-06 | 20.7 | 0.25 | .       | 1.4E-05 | 1.2E-05 |



Supplementary table 2

## Deleterious variants in BSN in UKBB cohort

| proband | Sex    | Age-recruitment | European | BMI  | HGVSP     | CADD_phred | gnomAD3_AF |
|---------|--------|-----------------|----------|------|-----------|------------|------------|
| 3376698 | female | 49              | NA       | 24.2 | Q211+2T>G | 24.8       | .          |
| 1298264 | male   | 60              | Y        | 41.2 | F498S     | 32         | .          |
| 5736922 | female | 62              | Y        | 27.2 | W510C     | 33         | .          |
| 3215658 | female | 58              | Y        | 36.0 | K571X     | 35         | .          |
| 3951330 | female | 61              | Y        | NA   | E662+1G>A | 23.6       | .          |
| 1004191 | male   | 60              | Y        | 28.3 | E662+2T>A | 22.6       | 6.99E-06   |
| 2802610 | male   | 51              | Y        | 38.8 | E662+2T>A | 22.6       | 6.99E-06   |
| 2059217 | male   | 45              | Y        | 29.7 | T714fs    | 26.5       | .          |
| 1372818 | male   | 41              | Y        | 45.5 | G1253fs   | 19.59      | .          |
| 5004856 | male   | 50              | Y        | 29.1 | R1276X    | 35         | .          |
| 2311136 | male   | 44              | Y        | 31.6 | R1276X    | 35         | .          |
| 3531133 | female | 65              | Y        | 31.7 | F1323fs   | 29.4       | .          |
| 2381858 | female | 66              | Y        | 23.9 | G1377fs   | 27.5       | .          |
| 1517223 | male   | 66              | Y        | 36.8 | R1447X    | 26.2       | .          |
| 1367126 | female | 64              | Y        | 46.8 | G1494fs   | 21.8       | .          |
| 5028981 | female | 51              | Y        | 30.9 | V1834fs   | 24.9       | .          |
| 2561154 | male   | 41              | Y        | 22.7 | V1834fs   | 24.9       | .          |
| 5638004 | female | 62              | Y        | 25.8 | A1929fs   | 23.7       | .          |
| 4492069 | female | 59              | Y        | 45.7 | Q1958fs   | 26.6       | .          |
| 2992473 | male   | 52              | Y        | 30.8 | Y2073X    | 27.7       | .          |
| 3348582 | female | 55              | Y        | 41.2 | Q2334X    | 37         | .          |
| 3424371 | male   | 43              | Y        | 31.8 | Q2451X    | 38         | .          |
| 5603259 | male   | 61              | Y        | 31.1 | Q2464X    | 39         | .          |
| 3472038 | female | 63              | NA       | 25.2 | R2486X    | 37         | .          |
| 1059118 | female | 44              | Y        | 42.6 | L2846fs   | 33         | .          |
| 5342528 | male   | 63              | Y        | 33.3 | P2915fs   | 26.1       | .          |
| 4911564 | female | 62              | Y        | 32.3 | Q3052X    | 38         | .          |
| 4452519 | female | 47              | Y        | 47.2 | Y3284fs   | 35         | .          |
| 2104485 | male   | 65              | NA       | 28.6 | Q3541X    | 43         | .          |
| 2714273 | female | 68              | Y        | 33.1 | Q3707X    | 42         | .          |
| 5896339 | female | 64              | Y        | 27.0 | Q3707X    | 42         | .          |
| 1677591 | male   | 55              | Y        | 35.3 | Q3854fs   | 33         | .          |

Supplementary table 3

**UKBB phenome-wide association for BSN LGD variants (24 variants)**

| <b>trait</b>                               | <b>BETA</b> | <b>SE</b> | <b>Pvalue</b> |
|--------------------------------------------|-------------|-----------|---------------|
| Whole_body_fat_mass                        | 12.50       | 1.86      | 1.63E-11      |
| Arm_fat_mass_(right)                       | 0.81        | 0.12      | 2.14E-11      |
| Arm_fat_mass_(left)                        | 0.89        | 0.13      | 4.02E-11      |
| Leg_fat_mass_(right)                       | 1.90        | 0.31      | 5.76E-10      |
| Leg_fat_mass_(left)                        | 1.81        | 0.30      | 1.45E-09      |
| Trunk_fat_mass                             | 5.91        | 1.02      | 6.74E-09      |
| Leg_fat-free_mass_(left)                   | 1.35        | 0.24      | 2.06E-08      |
| Leg_predicted_mass_(left)                  | 1.26        | 0.23      | 2.47E-08      |
| Leg_predicted_mass_(right)                 | 1.21        | 0.23      | 8.90E-08      |
| Leg_fat-free_mass_(right)                  | 1.28        | 0.24      | 1.11E-07      |
| Arm_fat_percentage_(right)                 | 7.42        | 1.46      | 3.83E-07      |
| Arm_fat_percentage_(left)                  | 7.40        | 1.47      | 5.19E-07      |
| Arm_fat-free_mass_(left)                   | 0.46        | 0.09      | 7.44E-07      |
| Arm_fat-free_mass_(right)                  | 0.42        | 0.09      | 1.46E-06      |
| Whole_body_water_mass                      | 4.40        | 0.92      | 1.54E-06      |
| Arm_predicted_mass_(right)                 | 0.39        | 0.08      | 1.78E-06      |
| Arm_predicted_mass_(left)                  | 0.42        | 0.09      | 1.99E-06      |
| Whole_body_fat-free_mass                   | 5.78        | 1.24      | 3.19E-06      |
| Body_fat_percentage                        | 5.72        | 1.24      | 4.39E-06      |
| Leg_fat_percentage_(right)                 | 4.70        | 1.08      | 1.35E-05      |
| Trunk_fat_percentage                       | 6.09        | 1.43      | 1.97E-05      |
| Leg_fat_percentage_(left)                  | 4.20        | 1.03      | 4.39E-05      |
| Trunk_fat-free_mass                        | 2.28        | 0.64      | 3.61E-04      |
| Trunk_predicted_mass                       | 2.16        | 0.61      | 4.30E-04      |
| High_light_scatter_reticulocyte_count      | 0.01        | 0.00      | 1.82E-03      |
| High_light_scatter_reticulocyte_percentage | 0.12        | 0.07      | 7.23E-02      |

Supplementary table 4

## ICD10 classification enrichment test for 27 BSN carriers in the 145103 UKBB European cohort

| ICD10 | meaning                                                                                | #Affected | #Affected BSN_carriers | p-value  |
|-------|----------------------------------------------------------------------------------------|-----------|------------------------|----------|
| Z824  | Family history of ischaemic heart disease and other diseases of the circulatory system | 6546      | 6                      | 1.10E-03 |
| I120  | Hypertensive renal disease with renal failure                                          | 438       | 2                      | 3.04E-03 |
| I10   | Essential (primary) hypertension                                                       | 39608     | 14                     | 7.90E-03 |
| K768  | Other specified diseases of liver                                                      | 722       | 2                      | 8.00E-03 |

Supplementary table 5

## BSN pLoF variants in All of US dataset

| Index | Age   | SEX | BMI | P. ancestry | HGVSc                | HGVSp                | VariantFunction         |
|-------|-------|-----|-----|-------------|----------------------|----------------------|-------------------------|
| 1     | 46-50 | F   | 33  | EUR         | c.594C>A             | p.Cys198Ter          | stop_gained             |
| 2     | 46-50 | M   | 36  | EUR         | c.1990del            | p.Leu664TrpfsTer50   | frameshift_variant      |
| 3     | 46-50 | F   | 43  | EUR         | c.3688C>T            | p.Gln1230Ter         | stop_gained             |
| 4     | 51-55 | F   | 38  | AFR         | c.3826C>T            | p.Arg1276Ter         | stop_gained             |
| 5     | 51-55 | F   | 38  | EUR         | c.5602G>T            | p.Gly1868Ter         | stop_gained             |
| 6     | 66-70 | M   | 30  | EUR         | c.5873_5874del       | p.Gln1958ArgfsTer9   | frameshift_variant      |
| 7     | 66-70 | M   | 22  | AMR         | c.7177G>T            | p.Glu2393Ter         | stop_gained             |
| 8     | 26-30 | F   | 25  | AFR         | c.7390C>T            | p.Gln2464Ter         | stop_gained             |
| 9     | 61-65 | F   | 35  | EUR         | c.7792_7793del       | p.Leu2598GluTer11    | frameshift_variant      |
| 10    | 56-60 | F   | 34  | EUR         | c.8641-2A>G          | p.Pro2881splice      | splice_acceptor_variant |
| 11    | 66-70 | F   | 43  | EUR         | c.9184C>T            | p.Gln3062Ter         | stop_gained             |
| 12    | 36-40 | M   | 27  | AFR         | c.9463C>T            | p.Gln3155Ter         | stop_gained             |
| 13    | 51-55 | F   | 32  | AMR         | c.9988C>T            | p.Arg3330Ter         | stop_gained             |
| 14    | 66-70 | F   | 45  | AFR         | c.11551_11552insGGGT | p.Ala3851GlyfsTer139 | frameshift_variant      |
| 15    | 56-60 | M   | 41  | EUR         | c.11509-5_11524del   | p.Pro3887splice      | splice_acceptor_variant |
